# Supplementary material
Source: publisher site journal article supplement (https://www.dovepress.com/article/570828)
Supplement: Supplementary file 1 [file Supplementary%20Material.pdf]

## Supplementary figure

supplementary Figure S1-S4: Scatter plot of the Mendelian analysis.

supplementary Figure S5-S7: Funnel plot of Mendelian randomization analysis.

supplementary Figure S8-S13: Leave-one-out plot of the Mendelian analysis

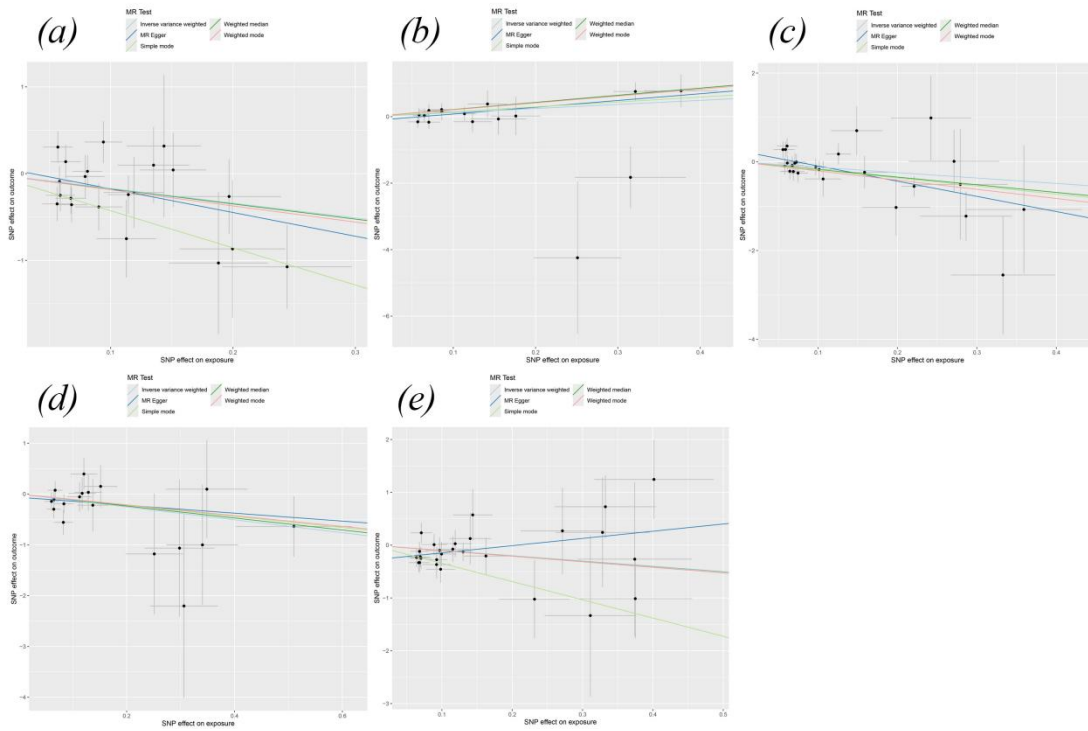

supplementary Figure S1: Scatter plot of the Mendelian analysis of inflammatory proteins for glossopharyngeal nerve disease. (a) CX3CL1. (b) MMP-1. (c) SLAMF1. (d) TNF. (e) TNFRSF9.

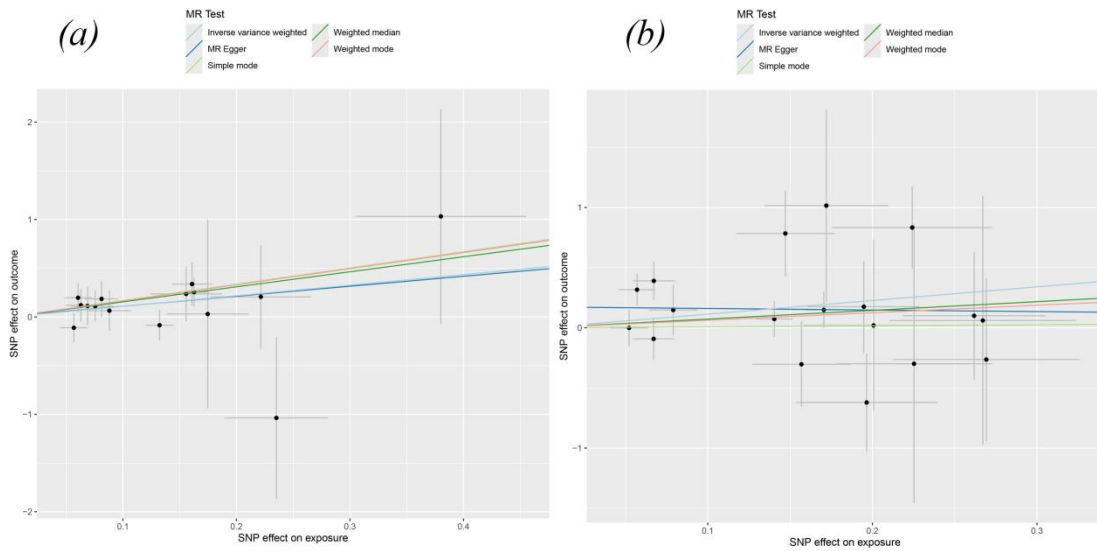

supplementary Figure S2. Scatter plot of the Mendelian analysis of inflammatory proteins for Phantom limb syndrome with pain. (a) FGF21. (b) Osteoprotegerin.

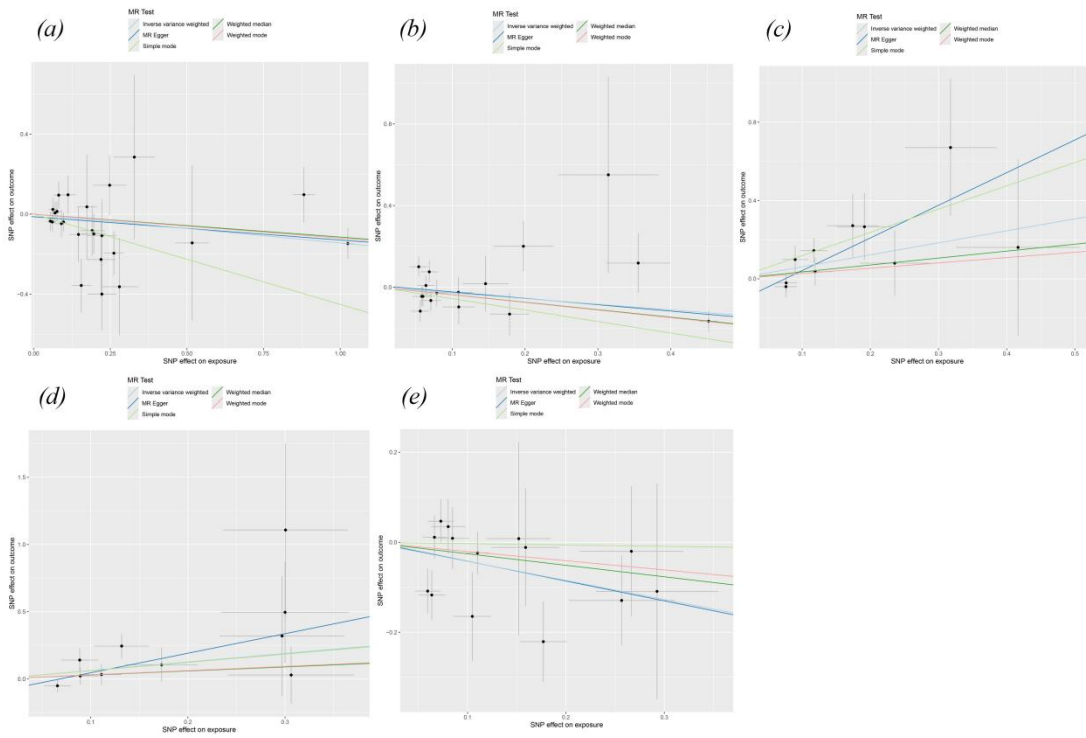

supplementary Figure S3: Scatter plot of the Mendelian analysis of inflammatory proteins for Small fiber neuropathy. (a) CD40LG. (b) IL-20RA. (c) IL-24. (d) CCL8. (e) OSM.

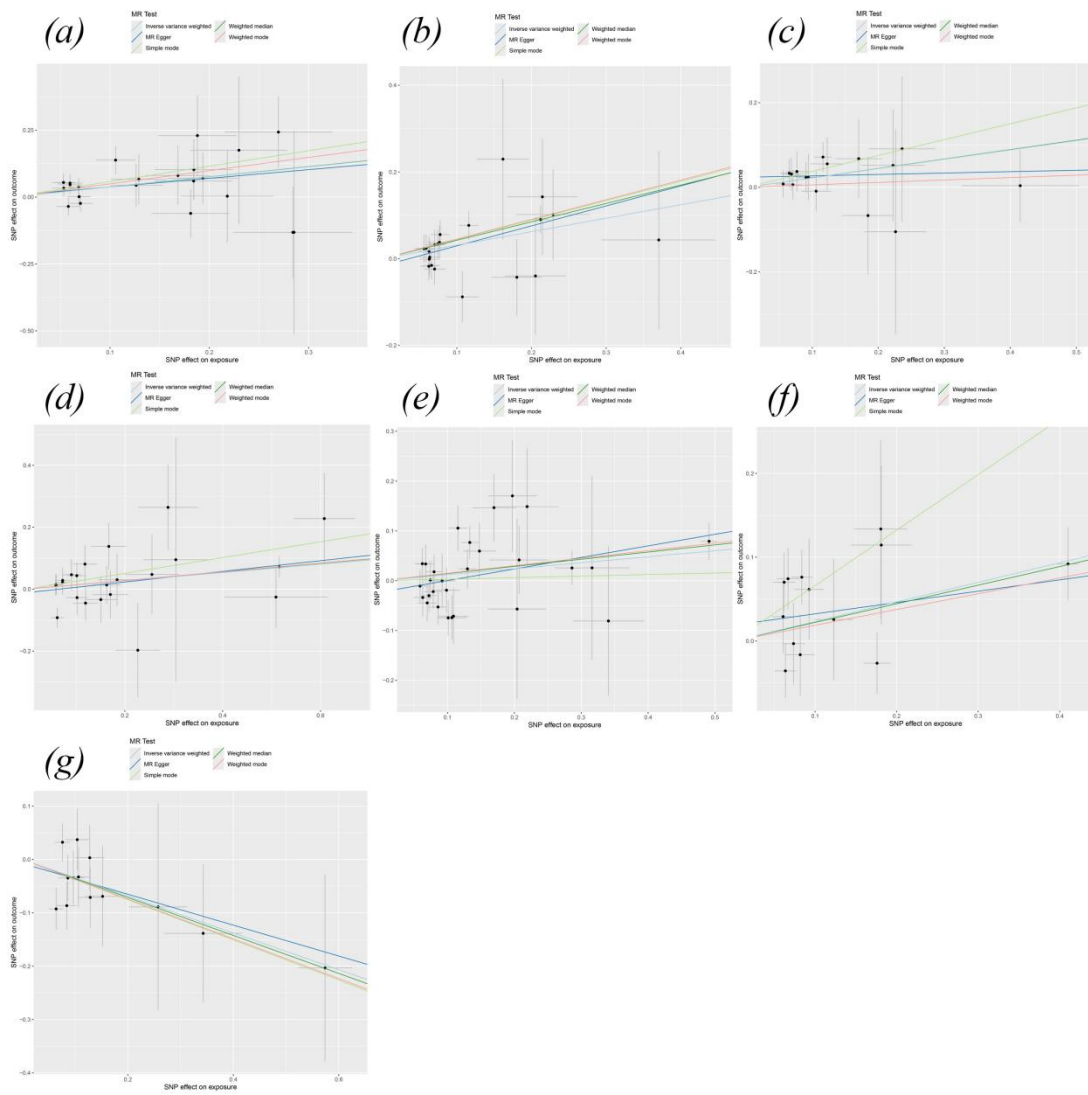

supplementary Figure S4: Scatter plot of the Mendelian analysis of inflammatory proteins for Unspecified neuralgia or neuritis. (a) CCL28. (b) CD244. (c) FGF23. (d) FGF5. (e) IL-12B. (f) CCL3. (g) SIRT2.

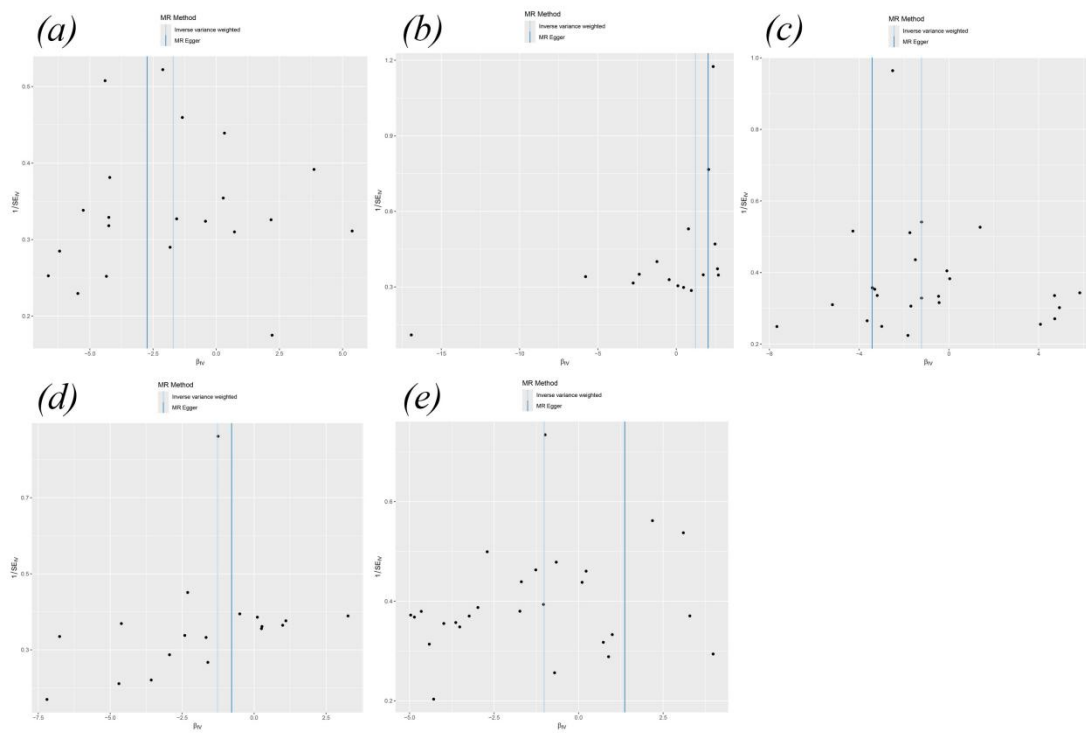

supplementary Figure S5: Funnel plot of Mendelian randomization analysis of inflammatory proteins for glossopharyngeal nerve disease. (a) CX3CL1. (b) MMP-1. (c) SLAMF1. (d) TNF. (e) TNFRSF9.

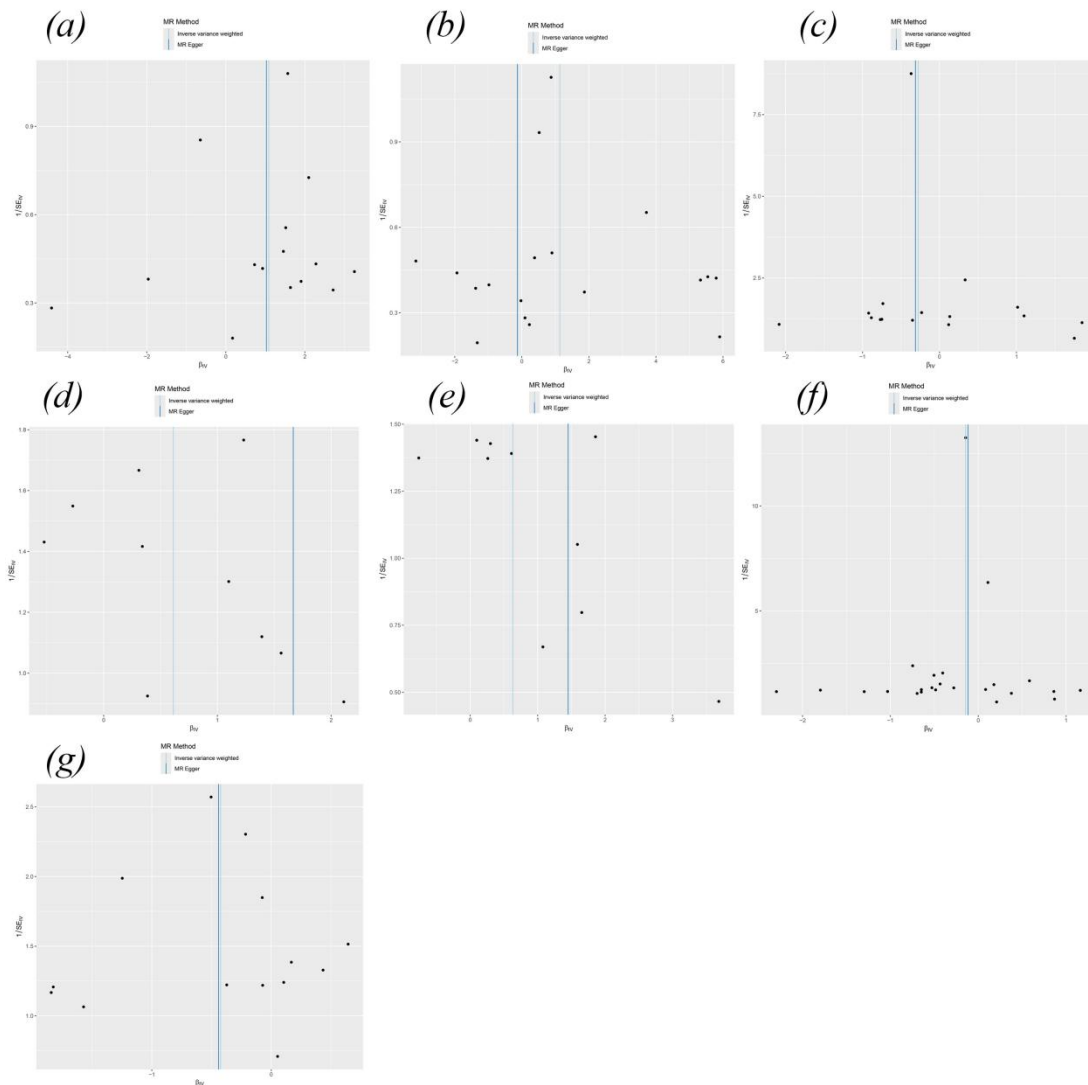

supplementary Figure S6:

(a),(b): Funnel plot of Mendelian randomization analysis of inflammatory proteins for Phantom limb syndrome with pain. (a) FGF21. (b) Osteoprotegerin.

(c)-(g): Funnel plot of Mendelian randomization analysis of inflammatory proteins for Small fiber neuropathy. (c) CD40LG. (d) IL-20RA. (e) IL-24. (f) CCL8. (g) OSM

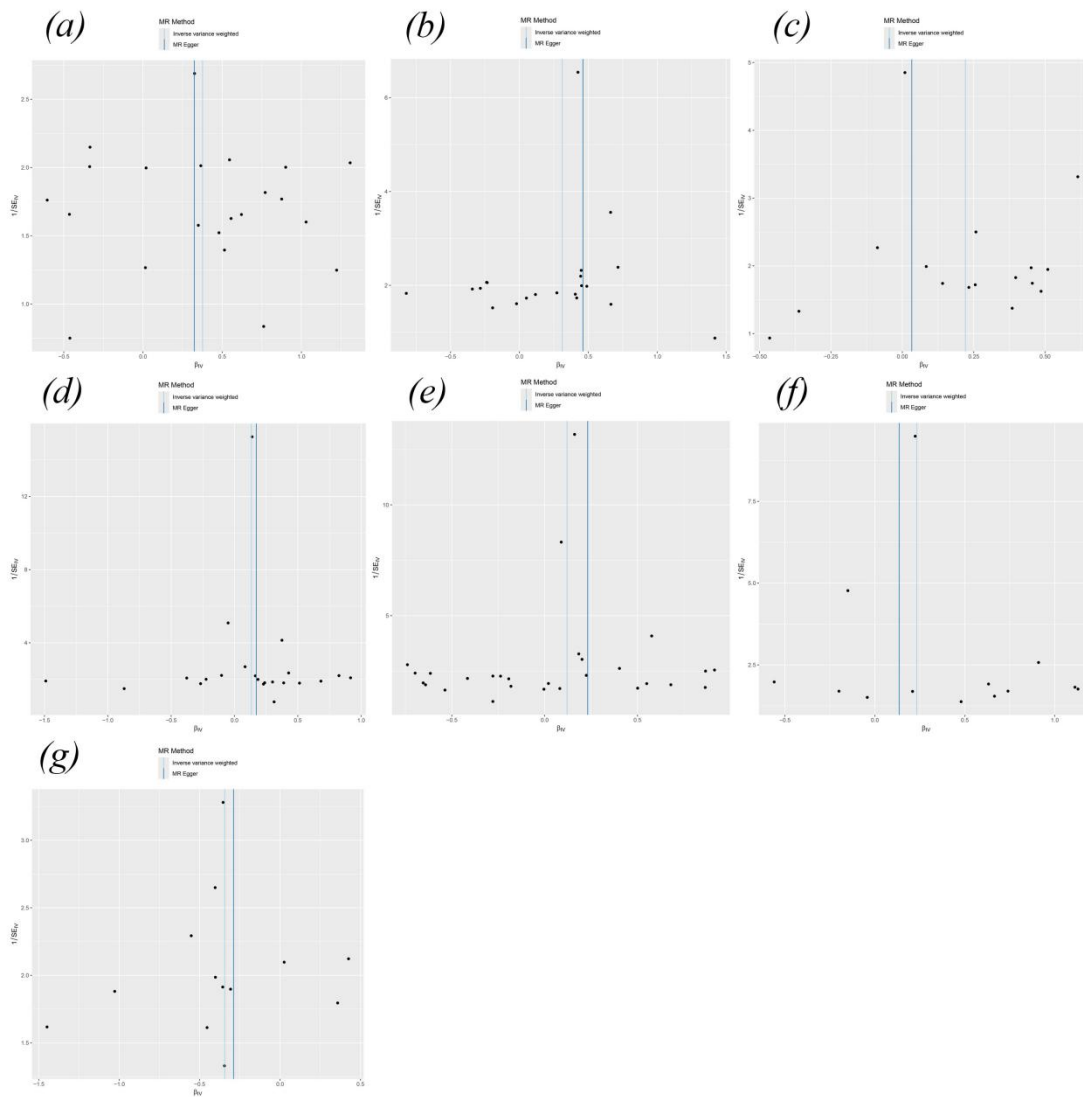

supplementary Figure S7: Funnel plot of Mendelian randomization analysis of inflammatory proteins for Unspecified neuralgia or neuritis. (a) CCL28. (b) CD244. (c) FGF23. (d) FGF5. (e) IL-12B. (f) CCL3. (g) SI RT2.

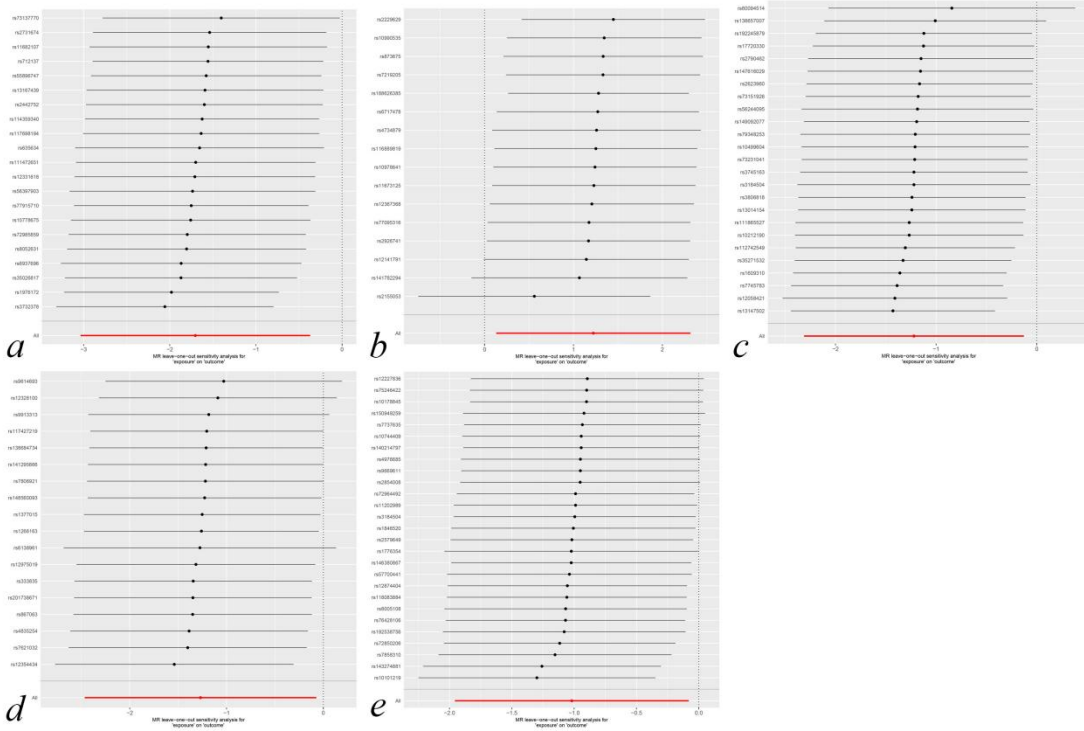

supplementary Figure S8: Leave-one-out plot of Mendelian randomization of inflammatory proteins to glossopharyngeal nerve disease. (a) CX3CL1. (b) MMP-1. (c) SLAMF1. (d) TNF. (e) TNFRSF9.

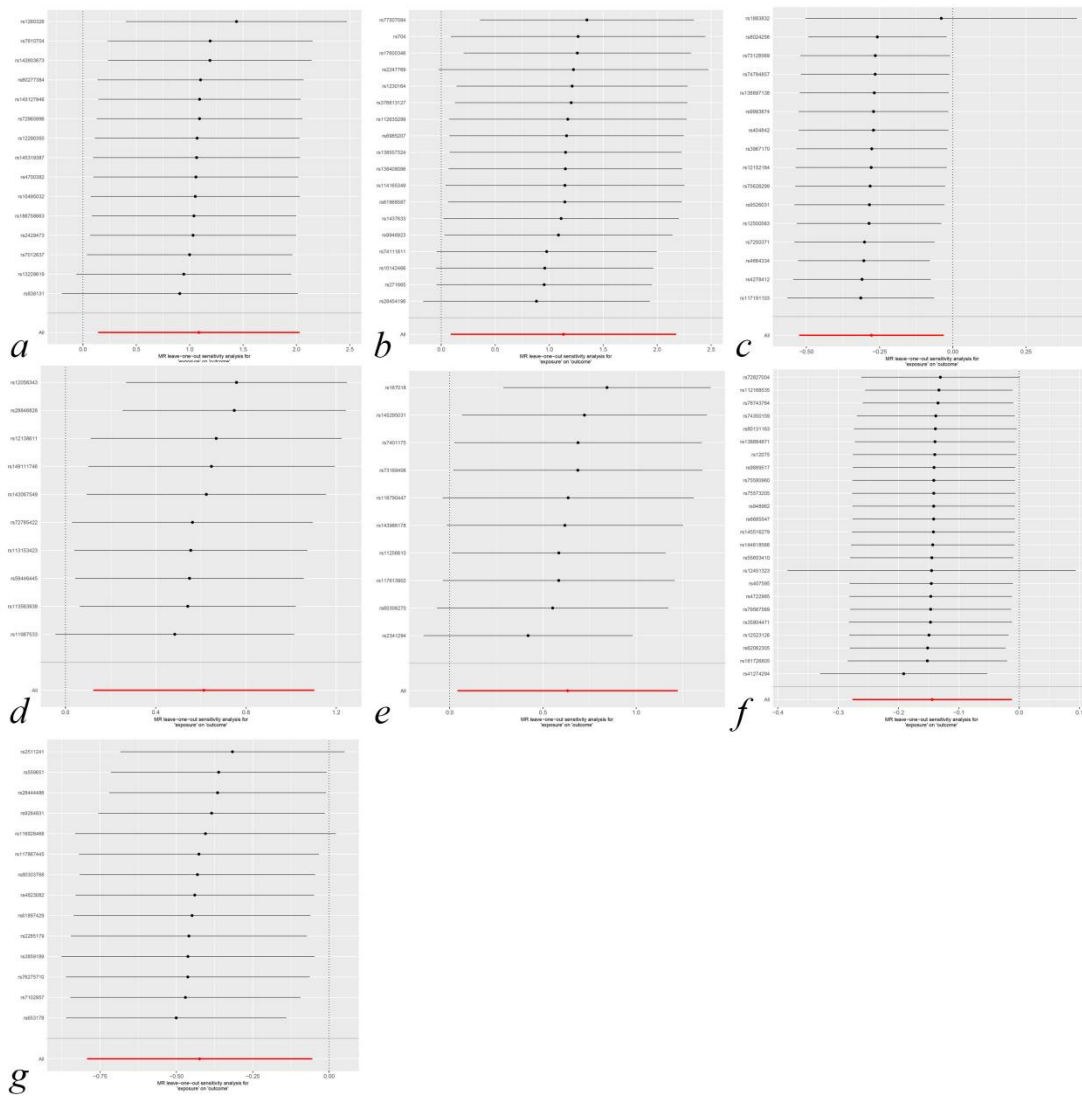

supplementary Figure S9:

(a),(b): Leave-one-out plot of Mendelian randomization of inflammatory proteins to Phantom limb syndrome with pain. (a) FGF21. (b) Osteoprotegerin.  
 (c)-(g): Leave-one-out plot of Mendelian randomization analysis of inflammatory proteins for Small fiber neuropathy. (c) CD40LG. (d) IL-20RA. (e) IL-24. (f) CCL8. (g) OSM

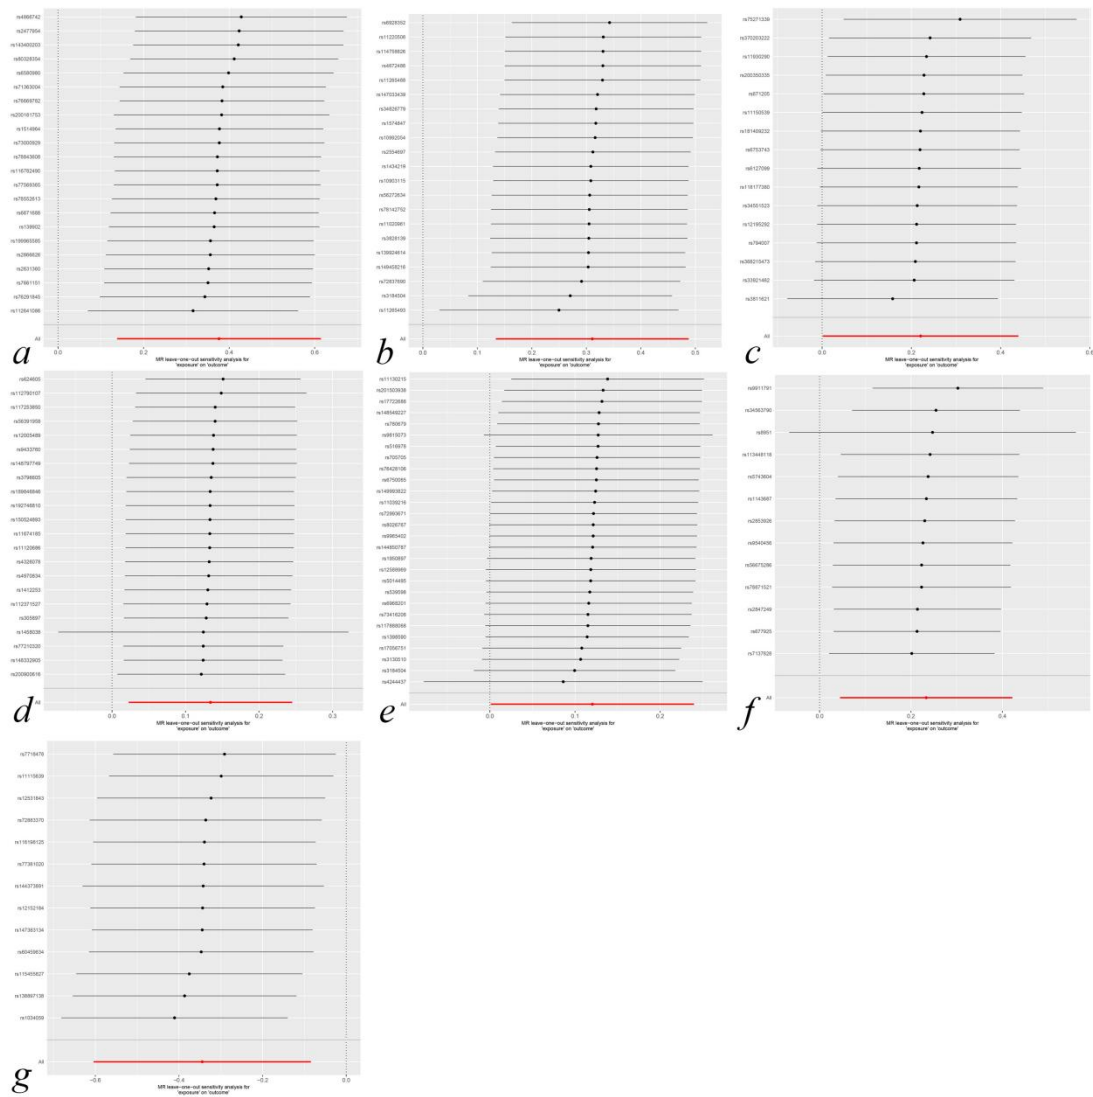

supplementary Figure S10: Leave-one-out plot of Mendelian randomization analysis of inflammatory proteins for Unspecified neuralgia or neuritis. (a) CCL28. (b) CD244. (c) FGF23. (d) FGF5. (e) IL-12B. (f) CCL3. (g) SIRT2.

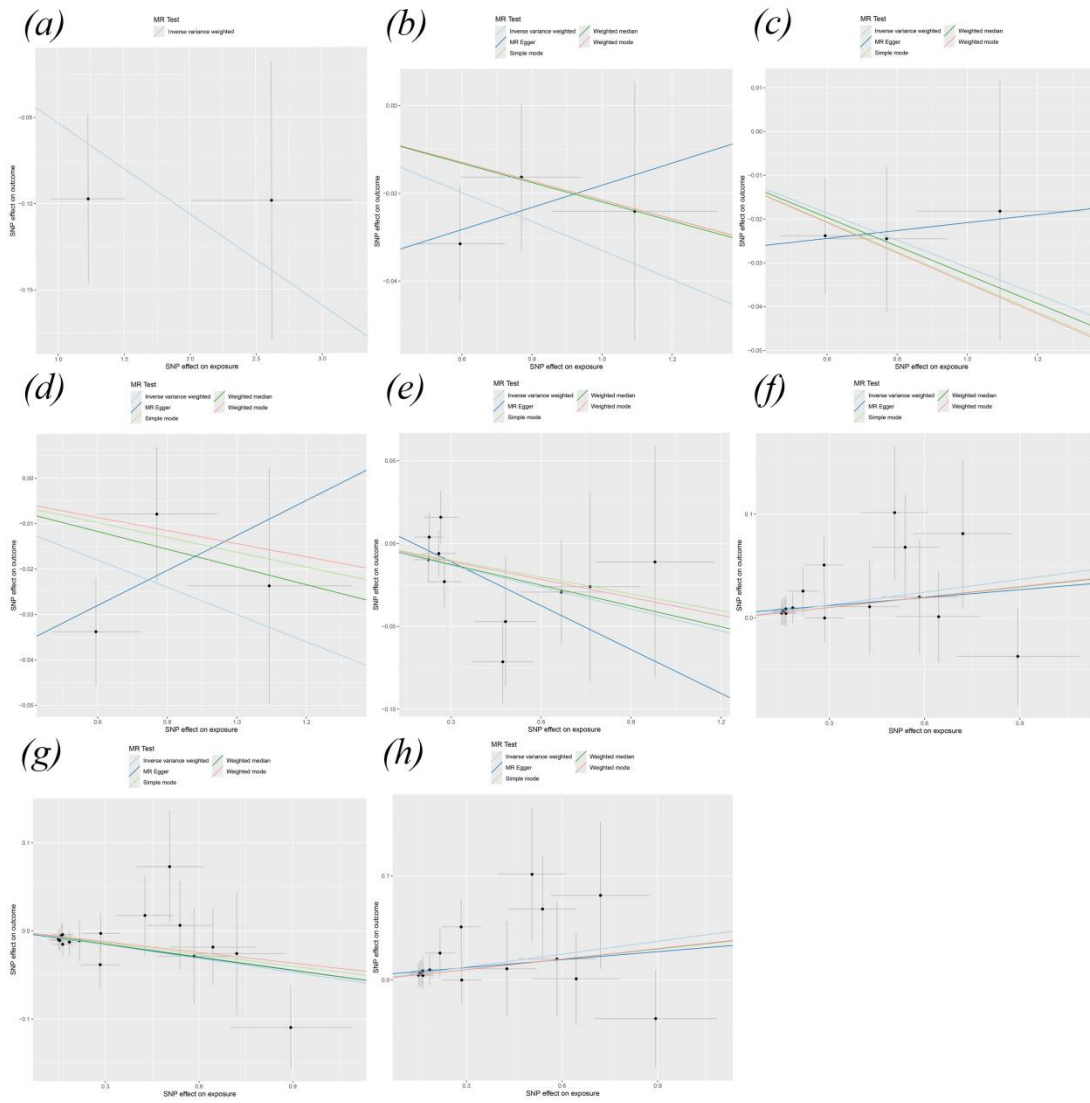

supplementary Figure S11: Scatter plot of the Mendelian analysis of Neuropathic pain for inflammatory proteins. (a)NT-3. (b) IL-10RA. (c) IL-17A. (d) TNFSF12. (e) IL-2RB. (f) IL-5. (g) CCL23. (h) CXCL5.

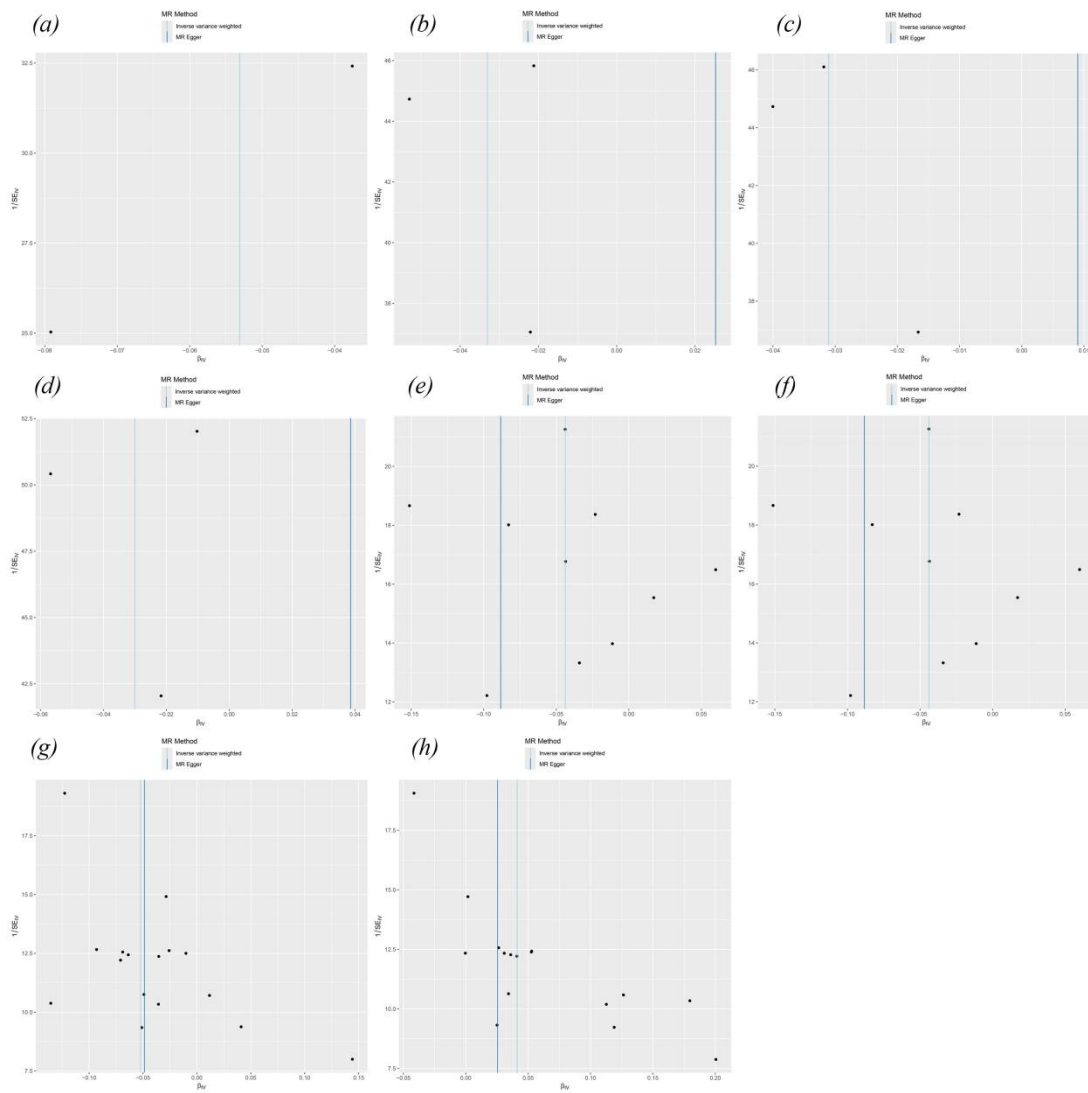

supplementary Figure S12: Funnel plot of the Mendelian analysis of Neuropathic pain for inflammatory proteins. (a)NT-3. (b) IL-10RA. (c) IL-17A. (d) TNFSF12. (e) IL-2RB. (f) IL-5. (g) CCL23. (h) CXCL5.

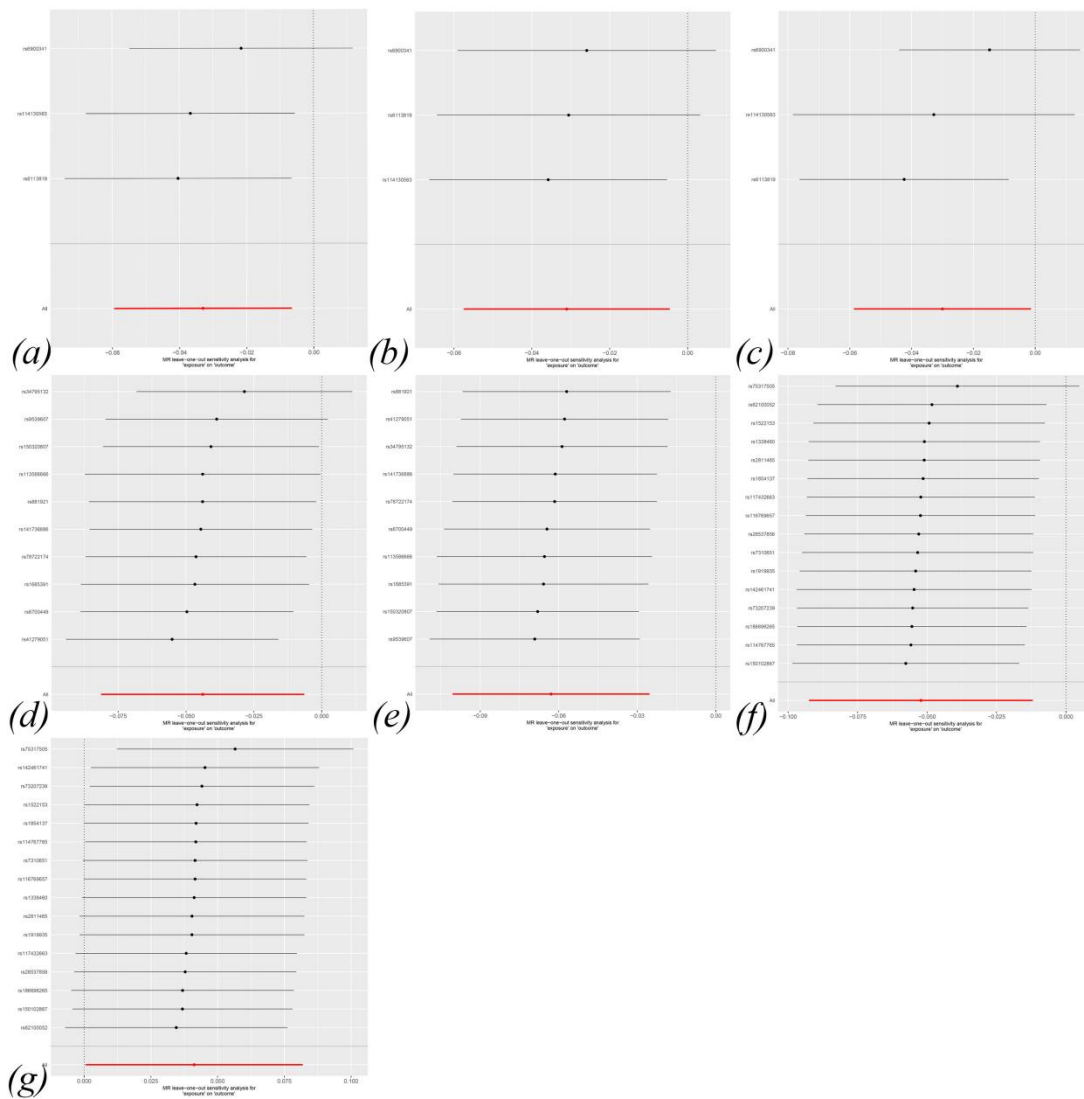

supplementary Figure S13: Leave-one-out plot of the Mendelian analysis of Neuropathic pain for inflammatory proteins. (a)IL-10RA. (b) IL-17A. (c) TNFSF12. (d) IL-2RB . (e) IL-5. (f) CCL23. (g) CXCL5.

## Supplementary table

| MR estimates of Inflammatory proteins on Neuropathic pain |                       |       |                           |               |       |               |                |       |                 |                |       |             |                |       |               |                |       |
|-----------------------------------------------------------|-----------------------|-------|---------------------------|---------------|-------|---------------|----------------|-------|-----------------|----------------|-------|-------------|----------------|-------|---------------|----------------|-------|
| Outcome                                                   | Inflammatory proteins | nSNP  | Inverse variance weighted |               |       | MR Egger      |                |       | Weighted median |                |       | Simple mode |                |       | Weighted mode |                |       |
|                                                           |                       |       | OR                        | 95CI          | pval  | OR            | 95CI           | pval  | OR              | 95CI           | pval  | OR          | 95CI           | pval  | OR            | 95CI           | pval  |
| Glossopharyngeal nerve disease                            | CX3CL1                | 21    | 0.182                     | (0.048,0.691) | 0.012 | 0.065         | (0.002,2.013)  | 0.135 | 0.174           | (0.027,1.14)   | 0.068 | 0.014       | (0,0.457)      | 0.026 | 0.155         | (0.008,3.144)  | 0.239 |
|                                                           | MMP-1                 | 16    | 3.399                     | (1.14,10.133) | 0.028 | 7.635         | (1.171,49.794) | 0.052 | 8.536           | (2.267,32.142) | 0.002 | 4.341       | (0.481,39.189) | 0.211 | 7.904         | (2.092,29.869) | 0.008 |
|                                                           | SLAMF1                | 25    | 0.295                     | (0.099,0.879) | 0.028 | 0.033         | (0.004,0.264)  | 0.004 | 0.178           | (0.046,0.695)  | 0.013 | 0.161       | (0.015,1.744)  | 0.146 | 0.126         | (0.022,0.727)  | 0.029 |
|                                                           | TNF                   | 18    | 0.281                     | (0.085,0.931) | 0.038 | 0.457         | (0.053,3.967)  | 0.488 | 0.307           | (0.051,1.834)  | 0.195 | 0.333       | (0.029,3.806)  | 0.389 | 0.346         | (0.049,2.419)  | 0.3   |
|                                                           | TNFRSF9               | 27    | 0.361                     | (0.141,0.923) | 0.033 | 3.921         | (0.506,30.361) | 0.203 | 0.365           | (0.085,1.555)  | 0.173 | 0.032       | (0.002,0.478)  | 0.019 | 0.349         | (0.035,3.493)  | 0.379 |
| Phantom limb syndrome with pain                           | FGF21                 | 15    | 2.961                     | (1.152,7.614) | 0.024 | 2.787         | (0.287,27.032) | 0.393 | 4.684           | (1.242,17.659) | 0.023 | 5.33        | (0.785,36.187) | 0.109 | 5.214         | (1.027,26.479) | 0.066 |
|                                                           | Osteoprotegerin       | 18    | 3.103                     | (1.092,8.818) | 0.034 | 0.879         | (0.101,7.669)  | 0.909 | 2.06            | (0.569,7.452)  | 0.271 | 1.086       | (0.095,12.345) | 0.948 | 1.865         | (0.49,7.099)   | 0.373 |
| Small fibre neuropathy                                    | CD40LG                | 16    | 0.758                     | (0.592,0.97)  | 0.027 | 0.731         | (0.513,1.042)  | 0.105 | 0.693           | (0.56,0.858)   | 0.001 | 0.571       | (0.274,1.19)   | 0.155 | 0.689         | (0.545,0.87)   | 0.007 |
|                                                           | IL-20RA               | 10    | 1.846                     | (1.131,3.013) | 0.014 | 5.299         | (1.579,17.777) | 0.027 | 1.425           | (0.723,2.808)  | 0.307 | 3.279       | (0.98,10.972)  | 0.086 | 1.312         | (0.484,3.56)   | 0.607 |
|                                                           | IL-24                 | 10    | 1.881                     | (1.042,3.396) | 0.036 | 4.272         | (1.116,16.352) | 0.067 | 1.348           | (0.629,2.891)  | 0.442 | 1.853       | (0.591,5.812)  | 0.318 | 1.365         | (0.545,3.42)   | 0.523 |
|                                                           | CCL8                  | 24    | 0.866                     | (0.758,0.988) | 0.033 | 0.89          | (0.757,1.047)  | 0.173 | 0.892           | (0.771,1.031)  | 0.121 | 0.637       | (0.372,1.091)  | 0.114 | 0.887         | (0.772,1.018)  | 0.102 |
|                                                           | OSM                   | 14    | 0.655                     | (0.453,0.947) | 0.024 | 0.644         | (0.283,1.463)  | 0.314 | 0.775           | (0.478,1.256)  | 0.3   | 0.971       | (0.429,2.196)  | 0.945 | 0.815         | (0.428,1.553)  | 0.545 |
| Neuralgia and neuritis, unspecified                       | CCL28                 | 22    | 1.457                     | (1.148,1.849) | 0.002 | 1.383         | (0.837,2.284)  | 0.22  | 1.461           | (1.035,2.063)  | 0.031 | 1.781       | (0.932,3.404)  | 0.095 | 1.639         | (0.881,3.049)  | 0.134 |
|                                                           | CD244                 | 21    | 1.365                     | (1.143,1.629) | 0.001 | 1.586         | (1.089,2.309)  | 0.026 | 1.529           | (1.179,1.983)  | 0.001 | 1.562       | (1.003,2.433)  | 0.062 | 1.573         | (1.195,2.071)  | 0.004 |
|                                                           | FGF23                 | 16    | 1.247                     | (1.002,1.553) | 0.048 | 1.034         | (0.673,1.587)  | 0.882 | 1.249           | (0.924,1.69)   | 0.148 | 1.456       | (0.868,2.441)  | 0.175 | 1.059         | (0.707,1.587)  | 0.784 |
|                                                           | FGF5                  | 22    | 1.143                     | (1.023,1.278) | 0.018 | 1.188         | (1.013,1.392)  | 0.047 | 1.149           | (1.018,1.298)  | 0.025 | 1.29        | (0.935,1.78)   | 0.135 | 1.151         | (1.023,1.295)  | 0.029 |
|                                                           | IL-12B                | 28    | 1.128                     | (1.001,1.271) | 0.048 | 1.261         | (1.048,1.518)  | 0.021 | 1.155           | (1.01,1.32)    | 0.035 | 1.031       | (0.704,1.512)  | 0.875 | 1.163         | (1.018,1.328)  | 0.034 |
|                                                           | CCL3                  | 13    | 1.263                     | (1.046,1.525) | 0.015 | 1.145         | (0.849,1.544)  | 0.395 | 1.249           | (1.021,1.528)  | 0.031 | 1.938       | (1.063,3.531)  | 0.052 | 1.207         | (0.978,1.489)  | 0.105 |
| SIRT2                                                     | 13                    | 0.709 | (0.547,0.919)             | 0.009         | 0.749 | (0.442,1.268) | 0.305          | 0.701 | (0.486,1.009)   | 0.056          | 0.686 | (0.393,1.2) | 0.211          | 0.689 | (0.428,1.111) | 0.153          |       |

Supplementary Table S1: MR estimates of Inflammatory proteins on Neuropathic pain

| MR estimates of Neuropathic pain on Inflammatory proteins |                       |        |                           |                 |       |        |                |       |        |                 |       |        |                 |       |        |                |       |  |
|-----------------------------------------------------------|-----------------------|--------|---------------------------|-----------------|-------|--------|----------------|-------|--------|-----------------|-------|--------|-----------------|-------|--------|----------------|-------|--|
| Exposure                                                  | Inflammatory proteins | nSNP   | Inverse variance weighted |                 |       |        | MR Egger       |       |        | Weighted median |       |        | Simple mode     |       |        | Weighted mode  |       |  |
|                                                           |                       |        | beta                      | 95CI            | pval  | beta   | 95CI           | pval  | beta   | 95CI            | pval  | beta   | 95CI            | pval  | beta   | 95CI           | pval  |  |
| Glossopharyngeal nerve disease                            | NT-3                  | 2.000  | -0.053                    | (-0.101,-0.005) | 0.030 | \      | \              | \     | \      | \               | \     | \      | \               | \     | \      | \              | \     |  |
| Phantom limb syndrome with pain                           | IL-10RA               | 3.000  | -0.033                    | (-0.059,-0.007) | 0.015 | 0.025  | (-0.097,0.148) | 0.755 | -0.022 | (-0.057,0.013)  | 0.217 | -0.022 | (-0.061,0.018)  | 0.397 | -0.022 | (-0.062,0.019) | 0.410 |  |
|                                                           | IL-17A                | 3.000  | -0.031                    | (-0.057,-0.005) | 0.021 | 0.009  | (-0.114,0.132) | 0.909 | -0.033 | (-0.065,0)      | 0.047 | -0.034 | (-0.071,0.002)  | 0.208 | -0.035 | (-0.075,0.006) | 0.236 |  |
|                                                           | TNFSF12               | 3.000  | -0.030                    | (-0.059,-0.001) | 0.040 | 0.039  | (-0.089,0.166) | 0.659 | -0.020 | (-0.052,0.013)  | 0.240 | -0.016 | (-0.057,0.024)  | 0.514 | -0.014 | (-0.054,0.025) | 0.548 |  |
| Small fibre neuropathy                                    | IL-2RB                | 10.000 | -0.044                    | (-0.081,-0.006) | 0.022 | -0.088 | (-0.183,0.006) | 0.105 | -0.042 | (-0.093,0.01)   | 0.111 | -0.034 | (-0.123,0.055)  | 0.475 | -0.036 | (-0.11,0.038)  | 0.366 |  |
|                                                           | IL-5                  | 10.000 | -0.063                    | (-0.101,-0.025) | 0.001 | -0.057 | (-0.152,0.038) | 0.273 | -0.056 | (-0.105,-0.006) | 0.027 | -0.090 | (-0.164,-0.016) | 0.042 | -0.048 | (-0.118,0.022) | 0.215 |  |
| Neuralgia and neuritis, unspecified                       | CCL23                 | 16.000 | -0.052                    | (-0.092,-0.012) | 0.011 | -0.049 | (-0.128,0.03)  | 0.248 | -0.049 | (-0.103,0.004)  | 0.069 | -0.045 | (-0.132,0.043)  | 0.336 | -0.041 | (-0.12,0.039)  | 0.333 |  |
|                                                           | CXCL5                 | 16.000 | 0.041                     | (0,0.082)       | 0.047 | 0.025  | (-0.055,0.106) | 0.544 | 0.033  | (-0.023,0.089)  | 0.243 | 0.033  | (-0.06,0.127)   | 0.493 | 0.033  | (-0.048,0.115) | 0.433 |  |

Supplementary Table S2: MR estimates of Neuropathic pain on Inflammatory proteins

| Exposure    | SNP         | effect_allele | other_allele | SNPs information of inflammatory proteins with Glossopharyngeal nerve disease |              |             |            |               |              |             |               |                     |          | R2       | f |
|-------------|-------------|---------------|--------------|-------------------------------------------------------------------------------|--------------|-------------|------------|---------------|--------------|-------------|---------------|---------------------|----------|----------|---|
|             |             |               |              | beta_exposure                                                                 | beta_outcome | se_exposure | se_outcome | pval_exposure | pval_outcome | se_exposure | pval_exposure | samplesize_exposure |          |          |   |
| CX3CL1      | rs10778675  | A             | C            | 0.079                                                                         | -0.034       | 0.169       | 0.152      | 8.90E-01      | 0.244        | 0.016       | 5.37E-07      | 14295               | 1.75E-03 | 2.51E+01 |   |
|             | rs11472651  | C             | G            | -0.119                                                                        | 0.217        | 0.936       | 0.950      | 5.96E-01      | 0.411        | 0.025       | 1.57E-06      | 14728               | 1.56E-03 | 2.31E+01 |   |
|             | rs114359340 | A             | G            | -0.188                                                                        | 1.030        | 0.975       | 0.988      | 2.09E-01      | 0.819        | 0.041       | 3.41E-06      | 13651               | 1.58E-03 | 2.16E+01 |   |
|             | rs11682107  | A             | G            | -0.068                                                                        | 0.284        | 0.557       | 0.544      | 1.08E-01      | 0.177        | 0.013       | 8.45E-08      | 12412               | 2.31E-03 | 2.87E+01 |   |
|             | rs117898194 | A             | G            | -0.200                                                                        | 0.867        | 0.022       | 0.013      | 2.73E-01      | 0.792        | 0.043       | 3.83E-06      | 13859               | 1.54E-03 | 2.13E+01 |   |
|             | rs12331618  | A             | G            | -0.058                                                                        | 0.091        | 0.491       | 0.426      | 6.09E-01      | 0.178        | 0.011       | 3.30E-07      | 14729               | 1.77E-03 | 2.61E+01 |   |
|             | rs13167439  | T             | C            | -0.090                                                                        | 0.384        | 0.890       | 0.882      | 1.62E-01      | 0.274        | 0.019       | 2.89E-06      | 14295               | 1.53E-03 | 2.19E+01 |   |
|             | rs1976172   | C             | G            | -0.057                                                                        | -0.306       | 0.353       | 0.380      | 9.42E-02      | 0.183        | 0.012       | 2.12E-06      | 14732               | 1.52E-03 | 2.25E+01 |   |
|             | rs2442752   | T             | C            | -0.059                                                                        | 0.250        | 0.618       | 0.655      | 1.76E-01      | 0.185        | 0.012       | 4.80E-07      | 14743               | 1.72E-03 | 2.53E+01 |   |
|             | rs2731674   | T             | G            | -0.068                                                                        | 0.358        | 0.274       | 0.260      | 7.50E-02      | 0.201        | 0.013       | 1.04E-07      | 14740               | 1.92E-03 | 2.83E+01 |   |
|             | rs35026817  | T             | G            | 0.063                                                                         | 0.137        | 0.333       | 0.302      | 4.80E-01      | 0.194        | 0.012       | 2.12E-07      | 14740               | 1.82E-03 | 2.69E+01 |   |
|             | rs3732378   | A             | G            | 0.094                                                                         | 0.364        | 0.167       | 0.159      | 1.30E-01      | 0.240        | 0.015       | 9.94E-10      | 14740               | 2.53E-03 | 3.73E+01 |   |
|             | rs5589674   | T             | C            | 0.113                                                                         | -0.750       | 0.937       | 0.961      | 9.32E-02      | 0.447        | 0.024       | 3.71E-06      | 14734               | 1.45E-03 | 2.14E+01 |   |
|             | rs56397903  | A             | G            | 0.197                                                                         | -0.264       | 0.974       | 0.955      | 5.38E-01      | 0.428        | 0.042       | 3.46E-06      | 14743               | 1.46E-03 | 2.15E+01 |   |
|             | rs835634    | T             | C            | -0.115                                                                        | 0.242        | 0.188       | 0.202      | 2.69E-01      | 0.219        | 0.017       | 5.29E-12      | 11792               | 4.02E-03 | 4.70E+01 |   |
|             | rs6937696   | T             | C            | -0.081                                                                        | -0.026       | 0.651       | 0.644      | 8.86E-01      | 0.185        | 0.012       | 1.40E-11      | 14742               | 3.09E-03 | 4.57E+01 |   |
|             | rs712137    | A             | C            | 0.056                                                                         | -0.349       | 0.660       | 0.728      | 7.74E-02      | 0.198        | 0.012       | 2.71E-06      | 14737               | 1.49E-03 | 2.20E+01 |   |
|             | rs72985859  | T             | C            | 0.135                                                                         | 0.097        | 0.081       | 0.044      | 8.23E-01      | 0.436        | 0.029       | 3.72E-06      | 8297                | 2.57E-03 | 2.14E+01 |   |
|             | rs73137770  | C             | G            | 0.244                                                                         | -1.074       | 0.981       | 0.988      | 2.55E-02      | 0.481        | 0.053       | 3.91E-06      | 13808               | 1.54E-03 | 2.13E+01 |   |
|             | rs77915710  | A             | G            | -0.144                                                                        | -0.317       | 0.040       | 0.012      | 6.99E-01      | 0.820        | 0.030       | 2.32E-06      | 14742               | 1.51E-03 | 2.23E+01 |   |
|             | rs8052631   | A             | G            | -0.151                                                                        | -0.042       | 0.946       | 0.954      | 9.22E-01      | 0.426        | 0.027       | 2.19E-08      | 14295               | 2.19E-03 | 3.13E+01 |   |
|             | rs10978641  | A             | T            | 0.065                                                                         | 0.030        | 0.746       | 0.792      | 8.90E-01      | 0.218        | 0.014       | 3.56E-06      | 14296               | 1.50E-03 | 2.15E+01 |   |
|             | rs10990535  | T             | C            | 0.070                                                                         | -0.166       | 0.253       | 0.265      | 4.07E-01      | 0.201        | 0.014       | 1.91E-07      | 14734               | 1.84E-03 | 2.71E+01 |   |
|             | rs11673125  | T             | C            | -0.059                                                                        | -0.056       | 0.296       | 0.248      | 7.84E-01      | 0.205        | 0.013       | 4.10E-06      | 14741               | 1.44E-03 | 2.12E+01 |   |
|             | rs116889819 | A             | G            | -0.176                                                                        | -0.018       | 0.046       | 0.025      | 9.75E-01      | 0.578        | 0.030       | 4.45E-09      | 14744               | 2.33E-03 | 3.44E+01 |   |
| rs12141791  | A           | G             | 0.086        | 0.212                                                                         | 0.698        | 0.634       | 2.45E-01   | 0.183         | 0.013        | 3.90E-11    | 14296         | 3.04E-03            | 4.37E+01 |          |   |
| rs12367368  | T           | G             | 0.086        | 0.148                                                                         | 0.115        | 0.150       | 5.49E-01   | 0.247         | 0.019        | 3.67E-06    | 14744         | 1.45E-03            | 2.14E+01 |          |   |
| rs141782294 | A           | G             | 0.377        | 0.777                                                                         | 0.978        | 0.968       | 1.14E-01   | 0.491         | 0.045        | 2.56E-17    | 14731         | 4.84E-03            | 7.16E+01 |          |   |
| rs188626385 | T           | C             | -0.251       | 4.244                                                                         | 0.018        | 0.001       | 6.42E-02   | 2.293         | 0.053        | 2.20E-06    | 12935         | 1.73E-03            | 2.24E+01 |          |   |
| rs2155053   | T           | C             | -0.321       | -0.756                                                                        | 0.946        | 0.951       | 5.67E-03   | 0.273         | 0.026        | 4.68E-34    | 14741         | 9.94E-03            | 1.48E+02 |          |   |
| rs2229629   | A           | G             | -0.315       | 1.825                                                                         | 0.014        | 0.011       | 4.85E-02   | 0.925         | 0.067        | 2.80E-06    | 10887         | 2.01E-03            | 2.19E+01 |          |   |
| rs2926791   | T           | C             | -0.070       | -0.185                                                                        | 0.344        | 0.310       | 3.28E-01   | 0.189         | 0.013        | 2.31E-08    | 14296         | 2.18E-03            | 3.12E+01 |          |   |
| rs4734879   | A           | G             | 0.114        | 0.038                                                                         | 0.742        | 0.779       | 6.80E-01   | 0.214         | 0.014        | 1.11E-16    | 14296         | 4.79E-03            | 6.87E+01 |          |   |
| rs6717478   | A           | T             | 0.155        | -0.070                                                                        | 0.966        | 0.962       | 8.81E-01   | 0.471         | 0.034        | 4.65E-06    | 14742         | 1.42E-03            | 2.10E+01 |          |   |
| rs7219205   | A           | G             | 0.057        | -0.157                                                                        | 0.502        | 0.579       | 3.85E-01   | 0.180         | 0.012        | 2.57E-06    | 14296         | 1.54E-03            | 2.21E+01 |          |   |
| rs77095316  | T           | G             | -0.142       | -0.380                                                                        | 0.071        | 0.050       | 3.51E-01   | 0.408         | 0.024        | 2.69E-09    | 14744         | 2.40E-03            | 3.54E+01 |          |   |
| rs873675    | T           | C             | 0.123        | -0.153                                                                        | 0.068        | 0.092       | 6.21E-01   | 0.308         | 0.023        | 1.34E-07    | 14742         | 1.88E-03            | 2.78E+01 |          |   |
| rs10212190  | A           | T             | 0.073        | -0.007                                                                        | 0.615        | 0.604       | 9.71E-01   | 0.180         | 0.012        | 1.88E-09    | 14285         | 2.52E-03            | 3.61E+01 |          |   |
| rs10499604  | T           | C             | 0.058        | -0.098                                                                        | 0.327        | 0.313       | 6.04E-01   | 0.189         | 0.013        | 3.48E-06    | 14730         | 1.46E-03            | 2.15E+01 |          |   |
| rs111865527 | T           | C             | 0.271        | 0.010                                                                         | 0.986        | 0.985       | 9.89E-01   | 0.709         | 0.057        | 1.88E-06    | 14244         | 1.59E-03            | 2.27E+01 |          |   |
| rs112742549 | T           | C             | 0.242        | 0.988                                                                         | 0.979        | 0.992       | 2.97E-01   | 0.948         | 0.051        | 1.71E-06    | 13499         | 1.69E-03            | 2.29E+01 |          |   |
| rs12058421  | A           | C             | -0.126       | -0.175                                                                        | 0.162        | 0.166       | 4.64E-01   | 0.238         | 0.016        | 2.80E-15    | 14731         | 4.22E-03            | 6.24E+01 |          |   |
| rs13014154  | A           | G             | -0.061       | 0.028                                                                         | 0.370        | 0.357       | 8.78E-01   | 0.183         | 0.012        | 6.50E-07    | 14285         | 1.73E-03            | 2.48E+01 |          |   |
| rs13147502  | A           | G             | -0.061       | -0.355                                                                        | 0.596        | 0.537       | 4.52E-02   | 0.177         | 0.013        | 1.62E-06    | 12843         | 1.79E-03            | 2.30E+01 |          |   |
| rs138657007 | A           | G             | -0.286       | 1.225                                                                         | 0.018        | 0.008       | 2.73E-02   | 0.555         | 0.058        | 6.98E-07    | 12790         | 1.92E-03            | 2.46E+01 |          |   |
| rs147616029 | T           | C             | -0.064       | 0.213                                                                         | 0.377        | 0.370       | 2.43E-01   | 0.182         | 0.013        | 4.87E-07    | 12850         | 1.97E-03            | 2.53E+01 |          |   |
| rs149092077 | A           | G             | -0.359       | 1.075                                                                         | 0.989        | 0.996       | 4.55E-01   | 1.440         | 0.073        | 8.63E-07    | 11137         | 2.17E-03            | 2.42E+01 |          |   |
| rs1609310   | T           | G             | -0.056       | -0.274                                                                        | 0.514        | 0.362       | 1.37E-01   | 0.184         | 0.012        | 3.46E-06    | 14286         | 1.51E-03            | 2.15E+01 |          |   |
| rs17720330  | C           | G             | -0.198       | 1.029                                                                         | 0.021        | 0.018       | 1.07E-01   | 0.639         | 0.043        | 4.04E-06    | 14727         | 1.44E-03            | 2.12E+01 |          |   |
| rs19245879  | A           | G             | 0.333        | -2.551                                                                        | 0.989        | 0.996       | 5.62E-02   | 1.536         | 0.066        | 3.76E-07    | 13799         | 1.87E-03            | 2.58E+01 |          |   |
| rs2623960   | T           | C             | 0.069        | -0.220                                                                        | 0.220        | 0.243       | 2.83E-01   | 0.205         | 0.014        | 1.50E-06    | 14286         | 1.62E-03            | 2.31E+01 |          |   |
| rs2790462   | T           | C             | -0.075       | 0.255                                                                         | 0.298        | 0.228       | 2.22E-01   | 0.209         | 0.013        | 3.06E-09    | 14733         | 2.38E-03            | 3.51E+01 |          |   |
| rs3184504   | T           | C             | 0.097        | -0.118                                                                        | 0.476        | 0.407       | 5.09E-01   | 0.179         | 0.013        | 8.55E-14    | 11783         | 4.70E-03            | 5.57E+01 |          |   |
| rs35271532  | A           | G             | -0.149       | -0.701                                                                        | 0.045        | 0.026       | 2.01E-01   | 0.549         | 0.032        | 4.51E-06    | 14286         | 1.47E-03            | 2.10E+01 |          |   |
| rs3745163   | A           | C             | 0.067        | -0.082                                                                        | 0.230        | 0.242       | 6.88E-01   | 0.205         | 0.015        | 3.35E-06    | 13669         | 1.58E-03            | 2.16E+01 |          |   |
| rs3806818   | A           | G             | 0.071        | -0.031                                                                        | 0.191        | 0.194       | 8.90E-01   | 0.224         | 0.015        | 3.82E-06    | 13853         | 1.54E-03            | 2.13E+01 |          |   |
| rs56244095  | A           | C             | 0.101        | -0.176                                                                        | 0.212        | 0.282       | 3.74E-01   | 0.198         | 0.016        | 8.38E-11    | 14286         | 2.94E-03            | 4.22E+01 |          |   |
| rs60094514  | T           | C             | 0.221        | -0.554                                                                        | 0.851        | 0.817       | 1.56E-02   | 0.229         | 0.016        | 2.45E-42    | 14732         | 1.25E-02            | 1.86E+02 |          |   |
| rs73151926  | T           | C             | 0.106        | -0.387                                                                        | 0.081        | 0.052       | 3.34E-01   | 0.401         | 0.023        | 3.45E-06    | 14286         | 1.51E-03            | 2.15E+01 |          |   |
| rs73231041  | C           | G             | -0.279       | 0.510                                                                         | 0.015        | 0.006       | 6.82E-01   | 1.245         | 0.060        | 3.05E-06    | 12735         | 1.71E-03            | 2.18E+01 |          |   |
| rs7745783   | T           | C             | -0.059       | -0.277                                                                        | 0.497        | 0.506       | 1.14E-01   | 0.175         | 0.012        | 7.44E-07    | 14286         | 1.71E-03            | 2.45E+01 |          |   |
| rs79348253  | A           | G             | -0.159       | 0.237                                                                         | 0.045        | 0.063       | 5.14E-01   | 0.364         | 0.030        | 7.75E-08    | 14719         | 1.96E-03            | 2.89E+01 |          |   |
| rs117427219 | A           | G             | -0.306       | 2.203                                                                         | 0.017        | 0.002       | 2.22E-01   | 1.806         | 0.063        | 1.13E-06    | 10850         | 2.18E-03            | 2.37E+01 |          |   |
| rs12328100  | A           | G             | -0.065       | 0.299                                                                         | 0.478        | 0.475       | 8.88E-02   | 0.176         | 0.013        | 5.97E-07    | 11784         | 2.11E-03            | 2.49E+01 |          |   |
| rs12354434  | A           | G             | -0.121       | -0.394                                                                        | 0.089        | 0.092       | 2.04E-01   | 0.310         | 0.025        | 1.03E-06    | 11337         | 2.10E-03            | 2.39E+01 |          |   |
| rs1266163   | A           | T             | 0.137        | -0.221                                                                        | 0.062        | 0.030       | 6.68E-01   | 0.514         | 0.029        | 1.90E-06    | 11337         | 2.00E-03            | 2.27E+01 |          |   |
| rs12975019  | C           | G             | -0.113       | 0.056                                                                         | 0.894        | 0.892       | 8.44E-01   | 0.286         | 0.023        | 6.14E-07    | 10278         | 2.41E-03            | 2.49E+01 |          |   |
| rs1377015   | A           | G             | -0.065       | 0.109                                                                         | 0.286        | 0.292       | 5.79E-01   | 0.196         | 0.014        | 4.25E-06    | 11783         | 1.79E-03            | 2.11E+01 |          |   |
| rs138684734 | A           | G             | 0.251        | -1.180                                                                        | 0.980        | 0.994       | 3.22E-01   | 1.190         | 0.053        | 2.44E-06    | 10850         | 2.04E-03            | 2.22E+01 |          |   |
| rs141295666 | T           | C             | 0.341        | -1.001                                                                        | 0.013        | 0.006       | 3.99E-01   | 1.186         | 0.066        | 2.48E-07    | 11337         | 2.34E-03            | 2.66E+01 |          |   |
| rs148560093 | A           | G             | -0.298       | 1.065                                                                         | 0.982        | 0.996       | 4.30E-01   | 1.351         | 0.065        | 3.97E-06    | 9984          | 2.13E-03            | 2.13E+01 |          |   |
| rs201738671 | CT          | C             | -0.349       | -0.095                                                                        | 0.015        | 0.009       | 9.21E-01   | 0.965         | 0.075        | 3.64E-06    | 7943          | 2.69E-03            | 2.14E+01 |          |   |
| rs3338335   | A           | T             | 0.129        | 0.033                                                                         | 0.916        | 0.934       | 9.27E-01   | 0.362         | 0.025        | 3.88E-07    | 1133          |                     |          |          |   |

| SNPs information of inflammatory proteins with Phantom limb syndrome with pain |                 |               |              |               |              |              |             |              |            |             |               |                     |          |          |          |
|--------------------------------------------------------------------------------|-----------------|---------------|--------------|---------------|--------------|--------------|-------------|--------------|------------|-------------|---------------|---------------------|----------|----------|----------|
| Exposure                                                                       | SNP             | effect_allele | other_allele | beta.exposure | beta.outcome | eaf.exposure | eaf.outcome | pval.outcome | se.outcome | se.exposure | pval.exposure | samplesize.exposure | R2       | f        |          |
| FGF21                                                                          | rs10495032      | T             | G            | -0.156        | -0.236       | 0.038        | 0.072       | 4.00E-01     | 0.280      | 0.032       | 9.77E-07      | 14720               | 1.63E-03 | 2.40E+01 |          |
|                                                                                | rs12290350      | T             | C            | -0.069        | -0.113       | 0.217        | 0.180       | 5.65E-01     | 0.196      | 0.015       | 2.02E-06      | 14295               | 1.58E-03 | 2.26E+01 |          |
|                                                                                | rs1260326       | T             | C            | 0.132         | -0.085       | 0.398        | 0.349       | 5.82E-01     | 0.155      | 0.012       | 1.03E-28      | 14730               | 8.32E-03 | 1.24E+02 |          |
|                                                                                | rs13229619      | A             | G            | -0.161        | -0.337       | 0.130        | 0.129       | 1.28E-01     | 0.222      | 0.018       | 6.13E-20      | 14743               | 5.64E-03 | 8.36E+01 |          |
|                                                                                | rs142603673     | T             | C            | -0.235        | 1.037        | 0.023        | 0.009       | 2.12E-01     | 0.832      | 0.046       | 2.35E-07      | 14252               | 1.87E-03 | 2.67E+01 |          |
|                                                                                | rs145127946     | A             | G            | -0.175        | -0.030       | 0.037        | 0.008       | 9.76E-01     | 0.969      | 0.036       | 1.22E-06      | 14295               | 1.64E-03 | 2.35E+01 |          |
|                                                                                | rs145319387     | G             | GT           | -0.076        | -0.110       | 0.769        | 0.685       | 4.89E-01     | 0.159      | 0.016       | 3.06E-06      | 10893               | 2.00E-03 | 2.18E+01 |          |
|                                                                                | rs188758663     | A             | G            | -0.380        | -1.032       | 0.010        | 0.005       | 3.51E-01     | 1.105      | 0.075       | 3.88E-07      | 11668               | 2.20E-03 | 2.57E+01 |          |
|                                                                                | rs2429473       | A             | C            | -0.081        | -0.185       | 0.795        | 0.808       | 3.24E-01     | 0.188      | 0.015       | 3.32E-08      | 14295               | 2.13E-03 | 3.05E+01 |          |
|                                                                                | rs4700382       | T             | C            | -0.063        | -0.120       | 0.270        | 0.271       | 4.77E-01     | 0.169      | 0.014       | 3.62E-06      | 14295               | 1.50E-03 | 2.15E+01 |          |
|                                                                                | rs60277384      | T             | C            | -0.088        | -0.064       | 0.892        | 0.850       | 7.55E-01     | 0.205      | 0.019       | 3.54E-06      | 14742               | 1.46E-03 | 2.15E+01 |          |
|                                                                                | rs7012637       | A             | G            | -0.061        | -0.197       | 0.481        | 0.508       | 1.86E-01     | 0.149      | 0.012       | 4.61E-07      | 14295               | 1.77E-03 | 2.54E+01 |          |
|                                                                                | rs72965996      | A             | G            | -0.222        | -0.206       | 0.031        | 0.021       | 6.98E-01     | 0.531      | 0.044       | 6.08E-07      | 13808               | 1.80E-03 | 2.49E+01 |          |
|                                                                                | rs7610704       | T             | C            | -0.057        | 0.112        | 0.464        | 0.526       | 4.55E-01     | 0.149      | 0.012       | 2.21E-06      | 14295               | 1.56E-03 | 2.24E+01 |          |
|                                                                                | rs838131        | A             | C            | 0.163         | 0.255        | 0.501        | 0.429       | 9.07E-02     | 0.151      | 0.013       | 6.15E-36      | 14294               | 1.08E-02 | 1.57E+02 |          |
|                                                                                | Osteoprotegerin | rs10142466    | A            | G             | 0.057        | 0.316        | 0.490       | 0.514        | 1.80E-02   | 0.134       | 0.011         | 1.70E-07            | 14721    | 1.85E-03 | 2.73E+01 |
|                                                                                |                 | rs112635299   | T            | G             | 0.262        | 0.100        | 0.021       | 0.020        | 8.51E-01   | 0.531       | 0.043         | 1.48E-09            | 14733    | 2.48E-03 | 3.66E+01 |
| rs114165349                                                                    |                 | C             | G            | -0.195        | -0.175       | 0.034        | 0.037       | 6.46E-01     | 0.382      | 0.034       | 1.01E-08      | 14727               | 2.22E-03 | 3.28E+01 |          |
| rs1230164                                                                      |                 | C             | G            | -0.067        | 0.092        | 0.729        | 0.752       | 5.95E-01     | 0.174      | 0.013       | 1.98E-07      | 14285               | 1.89E-03 | 2.71E+01 |          |
| rs138408096                                                                    |                 | A             | G            | -0.201        | -0.019       | 0.021        | 0.013       | 9.79E-01     | 0.711      | 0.042       | 2.09E-06      | 14721               | 1.53E-03 | 2.25E+01 |          |
| rs138557324                                                                    |                 | T             | C            | -0.225        | 0.299        | 0.020        | 0.005       | 7.96E-01     | 1.157      | 0.047       | 1.91E-06      | 14285               | 1.59E-03 | 2.27E+01 |          |
| rs1437633                                                                      |                 | A             | C            | -0.079        | -0.147       | 0.207        | 0.151       | 4.86E-01     | 0.212      | 0.015       | 7.69E-08      | 12851               | 2.24E-03 | 2.89E+01 |          |
| rs17600346                                                                     |                 | T             | C            | -0.157        | 0.304        | 0.963        | 0.954       | 3.95E-01     | 0.357      | 0.030       | 1.54E-07      | 14723               | 1.87E-03 | 2.75E+01 |          |
| rs2247769                                                                      |                 | T             | C            | -0.171        | -0.149       | 0.558        | 0.596       | 3.25E-01     | 0.151      | 0.011       | 1.42E-50      | 14285               | 1.54E-02 | 2.24E+02 |          |
| rs271665                                                                       |                 | T             | C            | -0.067        | -0.390       | 0.748        | 0.681       | 1.45E-02     | 0.159      | 0.013       | 1.90E-07      | 14710               | 1.84E-03 | 2.71E+01 |          |
| rs28454196                                                                     |                 | C             | G            | -0.224        | -0.833       | 0.976        | 0.977       | 1.54E-02     | 0.344      | 0.049       | 3.97E-06      | 14285               | 1.49E-03 | 2.13E+01 |          |
| rs376613127                                                                    |                 | A             | G            | -0.269        | 0.264        | 0.013        | 0.012       | 6.96E-01     | 0.676      | 0.057       | 2.14E-06      | 13154               | 1.70E-03 | 2.25E+01 |          |
| rs61968587                                                                     |                 | A             | G            | -0.267        | -0.060       | 0.984        | 0.994       | 9.53E-01     | 1.034      | 0.057       | 2.47E-06      | 13798               | 1.61E-03 | 2.22E+01 |          |
| rs6985207                                                                      |                 | A             | C            | 0.052         | -0.001       | 0.556        | 0.587       | 9.93E-01     | 0.152      | 0.011       | 4.67E-06      | 14285               | 1.47E-03 | 2.10E+01 |          |
| rs704                                                                          |                 | A             | G            | -0.140        | -0.073       | 0.473        | 0.418       | 6.30E-01     | 0.151      | 0.011       | 1.14E-36      | 14733               | 1.07E-02 | 1.60E+02 |          |
| rs74111611                                                                     |                 | T             | C            | -0.147        | -0.784       | 0.960        | 0.978       | 2.70E-02     | 0.354      | 0.030       | 7.96E-07      | 14732               | 1.65E-03 | 2.44E+01 |          |
| rs77507094                                                                     |                 | A             | G            | 0.197         | -0.621       | 0.979        | 0.964       | 1.28E-01     | 0.408      | 0.043       | 4.64E-06      | 14726               | 1.42E-03 | 2.10E+01 |          |
| rs946923                                                                       | T               | C             | 0.172        | 1.015         | 0.971        | 0.989        | 2.03E-01    | 0.798        | 0.038      | 4.77E-06    | 13230         | 1.58E-03            | 2.09E+01 |          |          |

Supplementary Table S4: SNPs used as instrumental variables in Mendelian Randomization analysis of inflammatory proteins Phantom limb syndrome with pain.

| Exposure    | SNP         | effect_allele | other_allele | SNPs information of inflammatory proteins with Small fibre neuropathy |              |               |              |               |            |             |                |                      |          | R2       | f |
|-------------|-------------|---------------|--------------|-----------------------------------------------------------------------|--------------|---------------|--------------|---------------|------------|-------------|----------------|----------------------|----------|----------|---|
|             |             |               |              | beta.exposure                                                         | beta.outcome | ca.f.exposure | ca.f.outcome | p.val.outcome | se.outcome | se.exposure | p.val.exposure | sample.size.exposure |          |          |   |
| CD40LG      | rs117191103 | T             | C            | 0.355                                                                 | 0.118        | 0.021         | 0.028        | 4.16E-01      | 0.146      | 0.044       | 4.28E-16       | 14736                | 4.47E-03 | 6.61E+01 |   |
|             | rs12152184  | A             | G            | 0.109                                                                 | -0.025       | 0.885         | 0.886        | 7.38E-01      | 0.075      | 0.021       | 1.21E-07       | 12402                | 2.25E-03 | 2.80E+01 |   |
|             | rs12500563  | T             | G            | 0.314                                                                 | 0.551        | 0.988         | 0.998        | 2.51E-01      | 0.480      | 0.069       | 4.76E-06       | 10795                | 1.94E-03 | 2.09E+01 |   |
|             | rs138897138 | A             | G            | 0.109                                                                 | -0.097       | 0.914         | 0.916        | 2.56E-01      | 0.085      | 0.022       | 4.50E-07       | 14288                | 1.78E-03 | 2.55E+01 |   |
|             | rs1883832   | T             | C            | -0.452                                                                | 0.167        | 0.258         | 0.271        | 1.24E-03      | 0.052      | 0.013       | 1.00E-200      | 14736                | 8.03E-02 | 1.22E+03 |   |
|             | rs3967170   | A             | G            | 0.079                                                                 | -0.028       | 0.135         | 0.159        | 6.72E-01      | 0.065      | 0.017       | 3.46E-06       | 14721                | 1.46E-03 | 2.15E+01 |   |
|             | rs404842    | A             | G            | -0.060                                                                | 0.045        | 0.643         | 0.596        | 3.55E-01      | 0.048      | 0.012       | 1.12E-06       | 14287                | 1.66E-03 | 2.37E+01 |   |
|             | rs4278412   | C             | G            | 0.198                                                                 | 0.201        | 0.020         | 0.039        | 1.04E-01      | 0.123      | 0.041       | 1.67E-06       | 14725                | 1.56E-03 | 2.29E+01 |   |
|             | rs4664334   | T             | C            | 0.054                                                                 | 0.100        | 0.500         | 0.484        | 3.60E-02      | 0.048      | 0.012       | 4.55E-06       | 14288                | 1.47E-03 | 2.10E+01 |   |
|             | rs7250371   | T             | C            | 0.069                                                                 | 0.075        | 0.365         | 0.312        | 1.41E-01      | 0.051      | 0.012       | 3.34E-09       | 14722                | 2.37E-03 | 3.50E+01 |   |
|             | rs73128369  | A             | T            | -0.179                                                                | 0.132        | 0.941         | 0.944        | 2.07E-01      | 0.104      | 0.027       | 2.53E-11       | 14288                | 3.11E-03 | 4.45E+01 |   |
|             | rs74794857  | T             | C            | 0.071                                                                 | -0.065       | 0.413         | 0.375        | 1.89E-01      | 0.050      | 0.014       | 3.00E-07       | 11760                | 2.23E-03 | 2.62E+01 |   |
|             | rs75626299  | C             | G            | 0.146                                                                 | 0.017        | 0.964         | 0.968        | 8.99E-01      | 0.136      | 0.032       | 3.95E-06       | 14728                | 1.44E-03 | 2.13E+01 |   |
|             | rs8024256   | A             | G            | -0.056                                                                | 0.117        | 0.309         | 0.293        | 2.44E-02      | 0.052      | 0.012       | 3.41E-06       | 14736                | 1.46E-03 | 2.16E+01 |   |
|             | rs9526031   | A             | C            | 0.064                                                                 | 0.009        | 0.488         | 0.593        | 8.60E-01      | 0.049      | 0.012       | 9.64E-08       | 14288                | 1.99E-03 | 2.84E+01 |   |
|             | rs9993874   | A             | G            | -0.058                                                                | 0.045        | 0.488         | 0.487        | 3.45E-01      | 0.047      | 0.013       | 3.22E-06       | 12403                | 1.74E-03 | 2.17E+01 |   |
|             | rs113153423 | A             | G            | 0.191                                                                 | 0.266        | 0.972         | 0.981        | 1.19E-01      | 0.171      | 0.041       | 2.60E-06       | 11792                | 1.87E-03 | 2.21E+01 |   |
|             | rs113563938 | A             | T            | 0.318                                                                 | 0.671        | 0.987         | 0.995        | 5.99E-02      | 0.351      | 0.068       | 2.62E-06       | 11344                | 1.94E-03 | 2.21E+01 |   |
|             | rs11987533  | A             | G            | 0.117                                                                 | 0.144        | 0.137         | 0.151        | 2.96E-02      | 0.066      | 0.020       | 3.34E-09       | 11344                | 3.07E-03 | 3.50E+01 |   |
|             | rs12056343  | T             | G            | -0.076                                                                | 0.040        | 0.749         | 0.721        | 4.54E-01      | 0.053      | 0.017       | 4.55E-06       | 9894                 | 2.12E-03 | 2.10E+01 |   |
| rs12138611  | C           | G             | 0.119        | 0.037                                                                 | 0.104        | 0.132         | 6.06E-01     | 0.071         | 0.026      | 3.34E-06    | 11344          | 1.90E-03             | 2.16E+01 |          |   |
| rs143067549 | T           | C             | -0.417       | -0.161                                                                | 0.011        | 0.002         | 7.21E-01     | 0.450         | 0.091      | 4.69E-06    | 7315           | 2.86E-03             | 2.10E+01 |          |   |
| rs149111746 | A           | G             | 0.236        | 0.080                                                                 | 0.021        | 0.021         | 6.30E-01     | 0.166         | 0.051      | 3.98E-06    | 11783          | 1.80E-03             | 2.13E+01 |          |   |
| rs28846828  | T           | C             | -0.077       | 0.021                                                                 | 0.423        | 0.365         | 6.74E-01     | 0.049         | 0.015      | 6.78E-07    | 8817           | 2.79E-03             | 2.47E+01 |          |   |
| rs59446445  | A           | G             | 0.174        | 0.272                                                                 | 0.032        | 0.022         | 9.63E-02     | 0.163         | 0.038      | 4.61E-06    | 11790          | 1.78E-03             | 2.10E+01 |          |   |
| rs72785422  | T           | C             | 0.090        | 0.099                                                                 | 0.831        | 0.860         | 1.52E-01     | 0.069         | 0.020      | 4.22E-06    | 11343          | 1.86E-03             | 2.12E+01 |          |   |
| rs11256610  | A           | G             | 0.301        | 1.108                                                                 | 0.015        | 0.001         | 8.60E-02     | 0.645         | 0.064      | 2.76E-06    | 10850          | 2.02E-03             | 2.20E+01 |          |   |
| rs116790447 | T           | C             | 0.173        | 0.106                                                                 | 0.052        | 0.039         | 3.95E-01     | 0.124         | 0.037      | 3.16E-06    | 9453           | 2.29E-03             | 2.17E+01 |          |   |
| rs117613902 | A           | G             | -0.300       | -0.496                                                                | 0.986        | 0.996         | 1.87E-01     | 0.376         | 0.066      | 4.97E-06    | 10850          | 1.92E-03             | 2.08E+01 |          |   |
| rs143986178 | A           | G             | 0.297        | 0.320                                                                 | 0.014        | 0.003         | 4.71E-01     | 0.444         | 0.064      | 4.62E-06    | 10850          | 1.96E-03             | 2.13E+01 |          |   |
| rs145295031 | A           | T             | 0.306        | 0.030                                                                 | 0.014        | 0.013         | 8.89E-01     | 0.213         | 0.065      | 2.20E-06    | 11287          | 1.98E-03             | 2.24E+01 |          |   |
| rs167018    | A           | G             | 0.066        | -0.050                                                                | 0.444        | 0.458         | 2.94E-01     | 0.048         | 0.014      | 1.36E-06    | 11336          | 2.05E-03             | 2.33E+01 |          |   |
| rs2341294   | A           | G             | -0.132       | -0.245                                                                | 0.072        | 0.083         | 6.95E-03     | 0.091         | 0.028      | 2.51E-06    | 9900           | 2.23E-03             | 2.22E+01 |          |   |
| rs60306270  | A           | G             | -0.089       | -0.141                                                                | 0.140        | 0.087         | 9.46E-02     | 0.084         | 0.019      | 3.51E-06    | 11781          | 1.82E-03             | 2.15E+01 |          |   |
| rs73169406  | A           | G             | 0.111        | 0.033                                                                 | 0.133        | 0.105         | 6.69E-01     | 0.078         | 0.021      | 8.22E-08    | 11337          | 2.53E-03             | 2.87E+01 |          |   |
| rs7401175   | A           | T             | 0.089        | 0.023                                                                 | 0.239        | 0.164         | 7.20E-01     | 0.065         | 0.020      | 4.78E-06    | 7943           | 2.63E-03             | 2.09E+01 |          |   |
| rs112168535 | T           | C             | -0.155       | 0.357                                                                 | 0.956        | 0.961         | 7.92E-03     | 0.134         | 0.032      | 8.90E-07    | 13670          | 1.76E-03             | 2.41E+01 |          |   |
| rs12075     | A           | G             | -0.097       | 0.039                                                                 | 0.555        | 0.532         | 4.09E-01     | 0.048         | 0.012      | 4.95E-17    | 14733          | 4.75E-03             | 7.03E+01 |          |   |
| rs12451323  | T           | C             | 1.025        | -0.147                                                                | 0.884        | 0.895         | 5.69E-02     | 0.077         | 0.017      | 1.00E-200   | 14288          | 1.95E-01             | 3.47E+03 |          |   |
| rs12523126  | A           | T             | 0.112        | 0.096                                                                 | 0.075        | 0.066         | 3.18E-01     | 0.096         | 0.023      | 1.35E-06    | 14288          | 1.63E-03             | 2.33E+01 |          |   |
| rs138884871 | T           | C             | 0.220        | -0.227                                                                | 0.019        | 0.016         | 2.31E-01     | 0.189         | 0.047      | 3.37E-06    | 13672          | 1.58E-03             | 2.16E+01 |          |   |
| rs144618566 | T           | C             | 0.517        | -0.144                                                                | 0.017        | 0.004         | 7.10E-01     | 0.388         | 0.054      | 7.15E-22    | 13801          | 6.65E-03             | 9.24E+01 |          |   |
| rs145516279 | A           | G             | 0.223        | -0.108                                                                | 0.979        | 0.982         | 5.48E-01     | 0.180         | 0.048      | 3.56E-06    | 14288          | 1.50E-03             | 2.15E+01 |          |   |
| rs181726805 | A           | G             | -0.248       | -0.144                                                                | 0.984        | 0.973         | 3.30E-01     | 0.148         | 0.054      | 3.75E-06    | 14736          | 1.45E-03             | 2.14E+01 |          |   |
| rs35904471  | T           | C             | 0.076        | 0.014                                                                 | 0.266        | 0.329         | 7.91E-01     | 0.051         | 0.017      | 3.99E-06    | 11337          | 1.87E-03             | 2.13E+01 |          |   |
| rs407595    | A           | C             | 0.070        | 0.006                                                                 | 0.207        | 0.240         | 9.17E-01     | 0.055         | 0.015      | 1.22E-06    | 14287          | 1.57E-03             | 2.25E+01 |          |   |
| rs41274294  | T           | C             | 0.882        | 0.097                                                                 | 0.968        | 0.970         | 4.84E-01     | 0.139         | 0.036      | 2.19E-135   | 14732          | 4.00E-02             | 6.13E+02 |          |   |
| rs4722985   | T           | C             | -0.063       | -0.024                                                                | 0.709        | 0.788         | 6.86E-01     | 0.058         | 0.013      | 2.52E-06    | 14288          | 1.55E-03             | 2.22E+01 |          |   |
| rs55653410  | A           | T             | -0.174       | -0.036                                                                | 0.042        | 0.008         | 8.90E-01     | 0.262         | 0.033      | 1.86E-07    | 14288          | 1.90E-03             | 2.72E+01 |          |   |
| rs62062305  | T           | G             | 0.082        | 0.095                                                                 | 0.855        | 0.854         | 1.58E-01     | 0.067         | 0.017      | 1.16E-06    | 14288          | 1.65E-03             | 2.36E+01 |          |   |
| rs6685547   | A           | G             | 0.146        | -0.102                                                                | 0.051        | 0.032         | 4.57E-01     | 0.137         | 0.029      | 4.22E-07    | 13239          | 1.93E-03             | 2.56E+01 |          |   |
| rs72827004  | C           | G             | 0.262        | -0.195                                                                | 0.046        | 0.050         | 7.47E-02     | 0.110         | 0.032      | 1.51E-16    | 14728          | 4.61E-03             | 6.81E+01 |          |   |
| rs74350159  | A           | G             | 0.280        | -0.363                                                                | 0.012        | 0.009         | 1.34E-01     | 0.242         | 0.061      | 4.19E-06    | 13801          | 1.53E-03             | 2.12E+01 |          |   |
| rs75573205  | C           | G             | 0.191        | -0.083                                                                | 0.976        | 0.962         | 5.09E-01     | 0.125         | 0.041      | 2.99E-06    | 14725          | 1.48E-03             | 2.18E+01 |          |   |
| rs75580960  | T           | C             | -0.090       | 0.048                                                                 | 0.870        | 0.853         | 4.80E-01     | 0.067         | 0.019      | 1.52E-06    | 13224          | 1.75E-03             | 2.31E+01 |          |   |
| rs78743764  | A           | C             | -0.223       | 0.400                                                                 | 0.019        | 0.017         | 7.77E-02     | 0.182         | 0.048      | 3.53E-06    | 13656          | 1.57E-03             | 2.15E+01 |          |   |
| rs79567569  | A           | C             | -0.328       | -0.285                                                                | 0.988        | 0.997         | 4.87E-01     | 0.410         | 0.067      | 9.16E-07    | 13386          | 1.80E-03             | 2.41E+01 |          |   |
| rs80131163  | A           | G             | 0.196        | -0.099                                                                | 0.969        | 0.941         | 3.29E-01     | 0.101         | 0.040      | 8.77E-07    | 14730          | 1.64E-03             | 2.42E+01 |          |   |
| rs948962    | A           | C             | 0.054        | -0.035                                                                | 0.476        | 0.558         | 4.62E-01     | 0.048         | 0.012      | 4.84E-06    | 14736          | 1.42E-03             | 2.09E+01 |          |   |
| rs9889517   | A           | G             | 0.061        | -0.039                                                                | 0.478        | 0.405         | 4.18E-01     | 0.049         | 0.012      | 4.83E-07    | 14288          | 1.77E-03             | 2.53E+01 |          |   |
| rs116928468 | A           | G             | -0.257       | 0.129                                                                 | 0.019        | 0.062         | 1.96E-01     | 0.100         | 0.054      | 1.69E-06    | 11770          | 1.94E-03             | 2.29E+01 |          |   |
| rs117867445 | C           | G             | 0.293        | -0.109                                                                | 0.017        | 0.010         | 6.49E-01     | 0.239         | 0.062      | 2.46E-06    | 10471          | 2.12E-03             | 2.22E+01 |          |   |
| rs2285179   | A           | G             | -0.066       | -0.011                                                                | 0.559        | 0.561         | 8.16E-01     | 0.048         | 0.012      | 5.50E-08    | 14288          | 2.06E-03             | 2.95E+01 |          |   |
| rs2511241   | T           | C             | 0.177        | -0.221                                                                | 0.916        | 0.923         | 1.32E-02     | 0.089         | 0.024      | 6.38E-14    | 13668          | 4.10E-03             | 5.62E+01 |          |   |
| rs28444486  | A           | G             | 0.064        | -0.117                                                                | 0.738        | 0.747         | 3.15E-02     | 0.054         | 0.014      | 2.92E-06    | 14735          | 1.48E-03             | 2.19E+01 |          |   |
| rs3859189   | A           | G             | 0.110        | -0.024                                                                | 0.537        | 0.558         | 6.21E-01     | 0.048         | 0.012      | 4.95E-21    | 14729          | 5.98E-03             | 8.85E+01 |          |   |
| rs4823082   | C           | G             | -0.159       | 0.011                                                                 | 0.036        | 0.034         | 9.30E-01     | 0.130         | 0.035      | 4.32E-06    | 14724          | 1.43E-03             | 2.11E+01 |          |   |
| rs559651    | T           | C             | -0.059       | 0.108                                                                 | 0.650        | 0.631         | 2.76E-02     | 0.049         | 0.013      | 2.01E-06    | 14715          | 1.53E-03             | 2.26E+01 |          |   |
| rs61897429  | A           | G             | -0.085       | -0.009                                                                | 0.139        | 0.140         | 8.97E-01     | 0.068         | 0.017      | 6.28E-07    | 14735          | 1.68E-03             | 2.48E+01 |          |   |
| rs653178    | T           | C             | -0.073       | -0.047                                                                | 0.522        | 0.586         | 3.30E-01     | 0.048         | 0.013      | 3.48E-08    | 11785          | 2.57E-03             | 3.04E+01 |          |   |
| rs7102957   | T           | C             | -0.080       | -0.035                                                                | 0.863        | 0.805         | 5.64E-01     | 0.060         | 0.017      | 3.46E-06    | 14288          | 1.51E-03             | 2.15E+01 |          |   |
| rs76275710  | A           | G             | 0.267        | -0.020                                                                | 0.018        | 0.028         | 8.89E-01     | 0.144         | 0.053      | 3.85E-07    | 14735          | 1.75E-03             | 2.58E+01 |          |   |
| rs80303768  | A           | G             | -0.152       | -0.008                                                                | 0.037        | 0.012         | 9.70E-01     | 0.214         | 0.033      | 3.35E-06    | 14722          |                      |          |          |   |

| Exposure    | SNP         | effect_allele | other_allele | SNPs information of inflammatory proteins with Unspecified neuralgia and neuritis |              |             |            |              |            |             |               |          |          | samplesize/exposure | R2 | f |
|-------------|-------------|---------------|--------------|-----------------------------------------------------------------------------------|--------------|-------------|------------|--------------|------------|-------------|---------------|----------|----------|---------------------|----|---|
|             |             |               |              | beta_exposure                                                                     | beta_outcome | es_exposure | es_outcome | pval_outcome | se_outcome | se_exposure | pval_exposure |          |          |                     |    |   |
| CCL28       | rs112641086 | T             | C            | -0.106                                                                            | -0.138       | 0.090       | 0.113      | 7.82E-03     | 0.052      | 0.020       | 9.64E-08      | 14731    | 1.93E-03 | 2.84E+01            |    |   |
|             | rs116782490 | A             | C            | 0.230                                                                             | 0.175        | 0.982       | 0.996      | 5.24E-01     | 0.275      | 0.049       | 2.49E-06      | 12633    | 1.73E-03 | 2.22E+01            |    |   |
|             | rs119902    | A             | C            | 0.068                                                                             | -0.068       | 0.366       | 0.366      | 2.61E-01     | 0.054      | 0.112       | 1.53E-06      | 14285    | 1.42E-03 | 2.30E+01            |    |   |
|             | rs143400203 | T             | C            | 0.181                                                                             | -0.061       | 0.024       | 0.032      | 5.00E-01     | 0.090      | 0.039       | 3.79E-06      | 14722    | 1.45E-03 | 2.14E+01            |    |   |
|             | rs1514964   | T             | C            | -0.126                                                                            | -0.044       | 0.949       | 0.959      | 5.82E-01     | 0.080      | 0.026       | 1.72E-06      | 14734    | 1.55E-03 | 2.29E+01            |    |   |
|             | rs199655385 | CT            | C            | 0.188                                                                             | 0.230        | 0.028       | 0.012      | 1.27E-01     | 0.151      | 0.040       | 1.94E-06      | 11336    | 1.99E-03 | 2.26E+01            |    |   |
|             | rs200181753 | T             | TG           | -0.184                                                                            | -0.060       | 0.971       | 0.943      | 3.82E-01     | 0.069      | 0.039       | 2.32E-06      | 11339    | 1.96E-03 | 2.23E+01            |    |   |
|             | rs2479754   | T             | C            | 0.059                                                                             | 0.025        | 0.621       | 0.603      | 2.87E-01     | 0.032      | 0.112       | 1.34E-11      | 14286    | 1.63E-03 | 2.34E+01            |    |   |
|             | rs26231360  | A             | C            | 0.060                                                                             | 0.052        | 0.548       | 0.655      | 1.21E-01     | 0.034      | 0.103       | 3.10E-06      | 11780    | 1.84E-03 | 2.17E+01            |    |   |
|             | rs2866626   | C             | G            | -0.060                                                                            | -0.046       | 0.608       | 0.604      | 1.61E-01     | 0.033      | 0.112       | 8.06E-07      | 14285    | 1.70E-03 | 2.43E+01            |    |   |
|             | rs4866742   | T             | C            | 0.070                                                                             | -0.023       | 0.413       | 0.412      | 4.72E-01     | 0.033      | 0.112       | 8.71E-09      | 12829    | 2.57E-03 | 3.31E+01            |    |   |
|             | rs503990    | A             | G            | -0.069                                                                            | -0.001       | 0.402       | 0.322      | 9.69E-01     | 0.034      | 0.112       | 5.53E-09      | 14285    | 2.37E-03 | 3.40E+01            |    |   |
|             | rs661668    | T             | C            | 0.053                                                                             | 0.051        | 0.541       | 0.546      | 3.03E-01     | 0.032      | 0.112       | 4.14E-06      | 14286    | 1.46E-03 | 2.12E+01            |    |   |
|             | rs7133034   | C             | G            | 0.218                                                                             | 0.003        | 0.980       | 0.991      | 9.83E-01     | 0.172      | 0.047       | 2.87E-06      | 11952    | 1.82E-03 | 2.19E+01            |    |   |
|             | rs7300029   | A             | G            | -0.194                                                                            | -0.071       | 0.035       | 0.030      | 4.63E-01     | 0.046      | 0.036       | 5.02E-08      | 14734    | 2.01E-03 | 2.97E+01            |    |   |
|             | rs76291845  | A             | G            | 0.270                                                                             | 0.243        | 0.986       | 0.985      | 7.13E-02     | 0.135      | 0.054       | 6.53E-07      | 14244    | 1.73E-03 | 2.47E+01            |    |   |
|             | rs7661151   | T             | C            | 0.053                                                                             | 0.055        | 0.632       | 0.627      | 9.93E-02     | 0.033      | 0.112       | 4.70E-06      | 14730    | 1.42E-03 | 2.10E+01            |    |   |
|             | rs7666972   | A             | C            | -0.285                                                                            | 0.132        | 0.018       | 0.002      | 7.29E-01     | 0.381      | 0.051       | 2.63E-08      | 12953    | 2.39E-03 | 3.09E+01            |    |   |
|             | rs7758965   | T             | G            | 0.139                                                                             | 0.066        | 0.956       | 0.969      | 4.78E-01     | 0.082      | 0.028       | 4.77E-06      | 14734    | 1.42E-03 | 2.09E+01            |    |   |
|             | rs78532613  | T             | C            | -0.184                                                                            | -0.103       | 0.027       | 0.021      | 3.66E-01     | 0.113      | 0.040       | 3.04E-06      | 14734    | 1.48E-03 | 2.18E+01            |    |   |
|             | rs7884308   | A             | G            | -0.168                                                                            | -0.081       | 0.038       | 0.023      | 4.62E-01     | 0.111      | 0.032       | 1.83E-07      | 14725    | 1.84E-03 | 2.72E+01            |    |   |
|             | rs80328354  | A             | T            | -0.284                                                                            | 0.132        | 0.988       | 0.991      | 4.42E-01     | 0.171      | 0.060       | 2.11E-06      | 14734    | 1.52E-03 | 2.25E+01            |    |   |
|             | rs1030315   | A             | G            | -0.056                                                                            | -0.023       | 0.443       | 0.446      | 4.71E-01     | 0.032      | 0.112       | 4.61E-06      | 14286    | 1.47E-03 | 2.10E+01            |    |   |
|             | rs1092354   | T             | C            | -0.045                                                                            | -0.017       | 0.997       | 0.997      | 8.24E-01     | 0.035      | 0.076       | 1.23E-04      | 12304    | 1.91E-03 | 2.34E+01            |    |   |
|             | rs1102061   | A             | G            | 0.077                                                                             | 0.038        | 0.817       | 0.777      | 3.33E-01     | 0.029      | 0.116       | 1.84E-06      | 14287    | 1.59E-03 | 2.28E+01            |    |   |
|             | rs11220506  | A             | G            | -0.070                                                                            | 0.024        | 0.188       | 0.260      | 5.12E-01     | 0.027      | 0.115       | 1.79E-06      | 14729    | 1.55E-03 | 2.28E+01            |    |   |
|             | rs11265488  | A             | G            | -0.062                                                                            | 0.018        | 0.468       | 0.442      | 5.83E-01     | 0.032      | 0.112       | 1.24E-07      | 14287    | 1.95E-03 | 2.80E+01            |    |   |
|             | rs11265493  | A             | G            | 0.212                                                                             | 0.040        | 0.407       | 0.396      | 5.43E-03     | 0.032      | 0.112       | 3.99E-71      | 14287    | 2.18E-02 | 3.18E+02            |    |   |
|             | rs114738226 | A             | G            | -0.180                                                                            | 0.043        | 0.039       | 0.045      | 6.23E-01     | 0.087      | 0.034       | 8.65E-08      | 14728    | 1.94E-03 | 2.87E+01            |    |   |
|             | rs139924614 | A             | G            | 0.162                                                                             | 0.230        | 0.967       | 0.992      | 2.15E-01     | 0.185      | 0.035       | 3.33E-06      | 14725    | 1.47E-03 | 2.16E+01            |    |   |
| rs1434219   | T           | C             | -0.059       | -0.024                                                                            | 0.439        | 0.432       | 4.63E-01   | 0.033        | 0.112      | 1.68E-06    | 14287         | 1.60E-03 | 2.29E+01 |                     |    |   |
| rs147033439 | A           | G             | 0.205        | -0.040                                                                            | 0.025        | 0.015       | 7.68E-01   | 0.135        | 0.041      | 5.88E-07    | 14731         | 1.69E-03 | 2.49E+01 |                     |    |   |
| rs14948216  | A           | C             | -0.215       | -0.143                                                                            | 0.018        | 0.015       | 2.89E-01   | 0.134        | 0.047      | 4.97E-06    | 14725         | 1.41E-03 | 2.08E+01 |                     |    |   |
| rs1578467   | C           | G             | -0.064       | -0.023                                                                            | 0.376        | 0.357       | 3.23E-01   | 0.035        | 0.114      | 4.53E-06    | 14287         | 1.47E-03 | 2.10E+01 |                     |    |   |
| rs2554697   | A           | G             | 0.063        | 0.017                                                                             | 0.635        | 0.665       | 6.17E-01   | 0.034        | 0.113      | 2.88E-06    | 11782         | 1.85E-03 | 2.19E+01 |                     |    |   |
| rs3184504   | T           | C             | 0.116        | 0.077                                                                             | 0.476        | 0.406       | 1.86E-02   | 0.033        | 0.113      | 1.27E-19    | 11784         | 6.92E-03 | 8.21E+01 |                     |    |   |
| rs3426779   | T           | G             | 0.063        | -0.001                                                                            | 0.248        | 0.218       | 9.78E-01   | 0.039        | 0.114      | 4.99E-06    | 14287         | 1.46E-03 | 2.08E+01 |                     |    |   |
| rs3828139   | T           | C             | 0.074        | 0.033                                                                             | 0.468        | 0.518       | 2.98E-01   | 0.032        | 0.112      | 4.05E-10    | 14286         | 2.73E-03 | 3.91E+01 |                     |    |   |
| rs4672486   | A           | G             | 0.066        | -0.015                                                                            | 0.453        | 0.450       | 6.30E-01   | 0.032        | 0.112      | 1.61E-08    | 14720         | 2.16E-03 | 3.19E+01 |                     |    |   |
| rs5272834   | T           | C             | 0.070        | 0.060                                                                             | 0.699        | 0.709       | 3.69E-01   | 0.035        | 0.113      | 3.81E-08    | 14729         | 2.12E-03 | 3.17E+01 |                     |    |   |
| rs6928352   | A           | G             | -0.107       | 0.082                                                                             | 0.079        | 0.081       | 1.33E-01   | 0.059        | 0.022      | 5.87E-07    | 14731         | 1.69E-03 | 2.50E+01 |                     |    |   |
| rs72837690  | T           | C             | -0.078       | -0.056                                                                            | 0.641        | 0.577       | 8.79E-02   | 0.033        | 0.113      | 5.37E-10    | 14287         | 2.69E-03 | 3.85E+01 |                     |    |   |
| rs78142752  | T           | C             | 0.229        | 0.102                                                                             | 0.018        | 0.024       | 3.29E-01   | 0.104        | 0.030      | 4.15E-06    | 14734         | 1.44E-03 | 2.12E+01 |                     |    |   |
| rs11120539  | T           | C             | -0.056       | -0.008                                                                            | 0.494        | 0.308       | 8.06E-01   | 0.032        | 0.112      | 2.53E-06    | 14287         | 1.53E-03 | 2.21E+01 |                     |    |   |
| rs118117380 | A           | G             | 0.236        | 0.091                                                                             | 0.019        | 0.009       | 5.97E-01   | 0.172        | 0.051      | 3.18E-07    | 14287         | 1.53E-03 | 2.17E+01 |                     |    |   |
| rs11930290  | A           | T             | -0.185       | 0.067                                                                             | 0.975        | 0.986       | 6.30E-01   | 0.139        | 0.039      | 2.11E-06    | 12848         | 1.75E-03 | 2.25E+01 |                     |    |   |
| rs12195292  | A           | G             | -0.077       | -0.057                                                                            | 0.863        | 0.866       | 4.30E-01   | 0.047        | 0.117      | 3.72E-06    | 14710         | 1.45E-03 | 2.14E+01 |                     |    |   |
| rs181409232 | A           | C             | -0.222       | -0.052                                                                            | 0.019        | 0.015       | 6.95E-01   | 0.132        | 0.048      | 3.43E-06    | 12846         | 1.68E-03 | 2.16E+01 |                     |    |   |
| rs20050353  | T           | TA            | 0.226        | -0.105                                                                            | 0.979        | 0.995       | 6.49E-01   | 0.242        | 0.047      | 1.27E-06    | 10852         | 2.16E-03 | 2.35E+01 |                     |    |   |
| rs2391462   | A           | G             | -0.053       | -0.023                                                                            | 0.237        | 0.215       | 3.21E-01   | 0.037        | 0.114      | 1.63E-06    | 14286         | 1.47E-03 | 2.10E+01 |                     |    |   |
| rs24515123  | A           | G             | 0.170        | 0.068                                                                             | 0.030        | 0.030       | 4.63E-01   | 0.093        | 0.035      | 9.75E-07    | 14730         | 1.63E-03 | 2.40E+01 |                     |    |   |
| rs368215473 | A           | G             | 0.123        | 0.055                                                                             | 0.094        | 0.073       | 3.74E-01   | 0.062        | 0.026      | 1.77E-06    | 9397          | 2.42E-03 | 2.88E+01 |                     |    |   |
| rs370203222 | C           | G             | 0.106        | -0.009                                                                            | 0.100        | 0.139       | 8.43E-01   | 0.047        | 0.022      | 1.84E-06    | 11759         | 1.93E-03 | 2.28E+01 |                     |    |   |
| rs3811621   | C           | G             | 0.116        | 0.071                                                                             | 0.290        | 0.295       | 4.17E-02   | 0.035        | 0.113      | 6.63E-19    | 14286         | 5.49E-03 | 7.88E+01 |                     |    |   |
| rs3120599   | A           | T             | 0.061        | 0.023                                                                             | 0.706        | 0.731       | 5.20E-01   | 0.036        | 0.113      | 1.30E-11    | 14287         | 3.20E-03 | 4.25E+01 |                     |    |   |
| rs711205    | T           | C             | 0.071        | 0.006                                                                             | 0.750        | 0.718       | 8.65E-01   | 0.036        | 0.114      | 1.95E-07    | 14287         | 1.89E-03 | 2.71E+01 |                     |    |   |
| rs6723743   | A           | T             | 0.094        | 0.024                                                                             | 0.873        | 0.903       | 6.00E-01   | 0.055        | 0.019      | 3.65E-07    | 14287         | 1.81E-03 | 2.59E+01 |                     |    |   |
| rs75271339  | A           | T             | -0.415       | -0.004                                                                            | 0.014        | 0.035       | 9.65E-01   | 0.086        | 0.089      | 3.12E-06    | 9947          | 2.18E-03 | 2.17E+01 |                     |    |   |
| rs794007    | T           | C             | 0.069        | 0.031                                                                             | 0.241        | 0.216       | 4.28E-01   | 0.039        | 0.114      | 1.97E-06    | 12844         | 1.76E-03 | 2.26E+01 |                     |    |   |
| rs11120866  | T           | C             | -0.060       | -0.014                                                                            | 0.604        | 0.615       | 6.65E-01   | 0.033        | 0.113      | 2.40E-06    | 11786         | 1.83E-03 | 2.22E+01 |                     |    |   |
| rs112271527 | A           | ATGG          | 0.444        | 0.340                                                                             | 0.844        | 0.837       | 3.19E-01   | 0.049        | 0.013      | 2.58E-07    | 8389          | 3.08E-03 | 3.75E+01 |                     |    |   |
| rs112790107 | A           | G             | 0.509        | -0.026                                                                            | 0.066        | 0.027       | 7.98E-01   | 0.106        | 0.106      | 1.64E-06    | 9645          | 2.33E-03 | 2.30E+01 |                     |    |   |
| rs11674185  | A           | G             | -0.059       | -0.013                                                                            | 0.364        | 0.352       | 6.90E-01   | 0.034        | 0.113      | 4.69E-06    | 11787         | 1.78E-03 | 2.10E+01 |                     |    |   |
| rs117238330 | T           | C             | 0.227        | -0.197                                                                            | 0.022        | 0.012       | 1.93E-01   | 0.152        | 0.045      | 5.67E-07    | 11781         | 2.12E-03 | 2.50E+01 |                     |    |   |
| rs1205489   | T           | C             | 0.151        | -0.041                                                                            | 0.046        | 0.047       | 6.53E-01   | 0.035        | 0.032      | 2.76E-06    | 10725         | 2.04E-03 | 2.20E+01 |                     |    |   |
| rs1412253   | A           | G             | -0.091       | -0.047                                                                            | 0.838        | 0.836       | 3.72E-01   | 0.051        | 0.019      | 2.20E-06    | 11778         | 1.90E-03 | 2.24E+01 |                     |    |   |
| rs1438038   | T           | C             | 0.516        | -0.072                                                                            | 0.317        | 0.347       | 3.42E-02   | 0.034        | 0.113      | 1.00E-200   | 11788         | 1.25E-01 | 1.68E+03 |                     |    |   |
| rs148323905 | T           | C             | 0.288        | 0.264                                                                             | 0.017        | 0.014       | 5.99E-02   | 0.138        | 0.061      | 2.12E-06    | 11341         | 1.98E-03 | 2.25E+01 |                     |    |   |
| rs148797749 | A           | G             | -0.171       | 0.017                                                                             | 0.036        | 0.047       | 8.21E-01   | 0.077        | 0.036      | 2.32E-06    | 11785         | 1.89E-03 | 2.23E+01 |                     |    |   |
| rs15024893  | A           | G             | 0.255        | 0.047                                                                             | 0.985        | 0.983       | 7.11E-01   | 0.128        | 0.055      | 3.71E-06    | 11298         | 1.89E-03 | 2.14E+01 |                     |    |   |
| rs18984846  | A           | G             | 0.025        | 0.004                                                                             | 0.025        | 0.015       | 3.98E-01   | 0.066        | 0.066      | 3.91E-06    | 9880          | 2.13E-03 | 2.19E+01 |                     |    |   |
| rs192746810 | A           | G             | -0.184       | -0.050                                                                            | 0.046        | 0.039       | 3.11E-01   | 0.084        | 0.040      | 3.11E-06    | 11341         | 1.91E-03 | 2.17E+01 |                     |    |   |
| rs20000616  | CA          | C             | -0.608       | -0.228                                                                            | 0.021        | 0.012       | 1.21E-01   | 0.147        | 0.063      | 3.20E-22    | 7943          |          |          |                     |    |   |

| SNPs information of Neuropathic pain with inflammatory proteins |                       |             |               |              |               |              |             |            |            |              |             |               |                    |          |        |
|-----------------------------------------------------------------|-----------------------|-------------|---------------|--------------|---------------|--------------|-------------|------------|------------|--------------|-------------|---------------|--------------------|----------|--------|
| Exposure                                                        | Inflammatory proteins | SNP         | effect_allele | other_allele | beta.exposure | beta.outcome | ef.exposure | ef.outcome | se.outcome | pval.outcome | se.exposure | pval.exposure | sampleize.exposure | R2       | f      |
| Glossopharyngeal nerve disease                                  | NT-3                  | rs117369515 | T             | C            | 2.619         | -0.098       | 0.002       | 0.010      | 0.081      | 2.23E-01     | 0.611       | 1.83E-05      | 435435             | 4.22E-05 | 18.357 |
|                                                                 |                       | rs144095072 | A             | G            | 1.229         | -0.097       | 0.034       | 0.019      | 0.049      | 4.75E-02     | 0.283       | 1.42E-05      | 435435             | 4.33E-05 | 18.838 |
| Phantom limb syndrome with pain                                 | IL-10RA               | rs114130563 | C             | A            | 1.093         | -0.024       | 0.043       | 0.057      | 0.030      | 4.14E-01     | 0.236       | 3.62E-06      | 262495             | 8.17E-05 | 21.456 |
|                                                                 |                       | rs6113819   | C             | T            | -0.770        | 0.016        | 0.242       | 0.216      | 0.017      | 3.32E-01     | 0.173       | 9.08E-06      | 262495             | 7.50E-05 | 19.695 |
|                                                                 |                       | rs6900341   | G             | T            | 0.595         | -0.032       | 0.377       | 0.388      | 0.013      | 1.79E-02     | 0.128       | 3.11E-06      | 262495             | 8.28E-05 | 21.748 |
|                                                                 |                       | rs114130563 | C             | A            | 1.093         | -0.018       | 0.043       | 0.057      | 0.030      | 5.39E-01     | 0.236       | 3.62E-06      | 262495             | 8.17E-05 | 21.456 |
|                                                                 |                       | rs6113819   | C             | T            | -0.770        | 0.025        | 0.242       | 0.216      | 0.017      | 1.42E-01     | 0.173       | 9.08E-06      | 262495             | 7.50E-05 | 19.695 |
|                                                                 | TNFSF12               | rs6900341   | G             | T            | 0.595         | -0.024       | 0.377       | 0.388      | 0.013      | 7.35E-02     | 0.128       | 3.11E-06      | 262495             | 8.28E-05 | 21.748 |
|                                                                 |                       | rs114130563 | C             | A            | 1.093         | -0.024       | 0.043       | 0.056      | 0.026      | 3.62E-01     | 0.236       | 3.62E-06      | 262495             | 8.17E-05 | 21.456 |
|                                                                 |                       | rs6113819   | C             | T            | -0.770        | 0.008        | 0.242       | 0.214      | 0.015      | 5.93E-01     | 0.173       | 9.08E-06      | 262495             | 7.50E-05 | 19.695 |
|                                                                 |                       | rs6900341   | G             | T            | 0.595         | -0.034       | 0.377       | 0.389      | 0.012      | 4.18E-03     | 0.128       | 3.11E-06      | 262495             | 8.28E-05 | 21.748 |
|                                                                 |                       | rs113586666 | A             | T            | -0.668        | 0.029        | 0.044       | 0.048      | 0.031      | 3.51E-01     | 0.138       | 1.28E-06      | 492478             | 4.76E-05 | 23.449 |
| Small fibre neuropathy                                          | IL-2RB                | rs141736886 | T             | C            | 0.764         | -0.026       | 0.012       | 0.015      | 0.057      | 6.50E-01     | 0.167       | 4.82E-06      | 492478             | 4.25E-05 | 20.907 |
|                                                                 |                       | rs150320807 | G             | T            | 0.481         | -0.047       | 0.039       | 0.0328     | 0.039      | 2.32E-01     | 0.105       | 4.26E-06      | 492478             | 4.29E-05 | 21.144 |
|                                                                 |                       | rs1685391   | G             | A            | -0.259        | 0.006        | 0.252       | 0.293      | 0.014      | 6.70E-01     | 0.056       | 3.73E-06      | 492478             | 4.34E-05 | 21.397 |
|                                                                 |                       | rs34795132  | C             | G            | -0.472        | 0.071        | 0.072       | 0.079      | 0.025      | 4.77E-03     | 0.103       | 4.35E-06      | 492478             | 4.28E-05 | 21.103 |
|                                                                 |                       | rs41279051  | T             | C            | -0.265        | -0.016       | 0.237       | 0.205      | 0.016      | 3.23E-01     | 0.058       | 4.26E-06      | 492478             | 4.29E-05 | 21.145 |
|                                                                 |                       | rs6700449   | A             | G            | 0.227         | 0.004        | 0.317       | 0.269      | 0.015      | 7.89E-01     | 0.049       | 3.49E-06      | 492478             | 4.37E-05 | 21.528 |
|                                                                 |                       | rs78722174  | T             | C            | 0.980         | -0.011       | 0.008       | 0.016      | 0.070      | 8.74E-01     | 0.199       | 8.69E-07      | 492478             | 4.91E-05 | 24.198 |
|                                                                 |                       | rs881921    | A             | G            | 0.225         | -0.010       | 0.604       | 0.541      | 0.013      | 4.65E-01     | 0.049       | 3.73E-06      | 492478             | 4.35E-05 | 21.401 |
|                                                                 |                       | rs9539607   | T             | C            | -0.277        | 0.023        | 0.224       | 0.247      | 0.015      | 1.35E-01     | 0.059       | 2.26E-06      | 492478             | 4.54E-05 | 22.363 |
|                                                                 |                       | rs113586666 | A             | T            | -0.668        | 0.033        | 0.044       | 0.049      | 0.032      | 2.98E-01     | 0.138       | 1.28E-06      | 492478             | 4.76E-05 | 23.449 |
|                                                                 | IL-5                  | rs141736886 | T             | C            | 0.764         | -0.066       | 0.012       | 0.015      | 0.058      | 2.58E-01     | 0.167       | 4.82E-06      | 492478             | 4.25E-05 | 20.907 |
|                                                                 |                       | rs150320807 | G             | T            | 0.481         | 0.013        | 0.039       | 0.033      | 0.040      | 7.38E-01     | 0.105       | 4.26E-06      | 492478             | 4.29E-05 | 21.144 |
|                                                                 |                       | rs1685391   | G             | A            | -0.259        | 0.011        | 0.252       | 0.293      | 0.015      | 4.61E-01     | 0.056       | 3.73E-06      | 492478             | 4.34E-05 | 21.397 |
|                                                                 |                       | rs34795132  | C             | G            | -0.472        | 0.043        | 0.072       | 0.079      | 0.025      | 8.79E-02     | 0.103       | 4.35E-06      | 492478             | 4.28E-05 | 21.103 |
|                                                                 |                       | rs41279051  | T             | C            | -0.265        | 0.030        | 0.237       | 0.206      | 0.017      | 7.19E-02     | 0.058       | 4.26E-06      | 492478             | 4.29E-05 | 21.145 |
|                                                                 |                       | rs6700449   | A             | G            | 0.227         | -0.011       | 0.317       | 0.271      | 0.015      | 4.81E-01     | 0.049       | 3.49E-06      | 492478             | 4.37E-05 | 21.528 |
|                                                                 |                       | rs78722174  | T             | C            | 0.980         | -0.079       | 0.008       | 0.016      | 0.070      | 2.58E-01     | 0.199       | 8.69E-07      | 492478             | 4.91E-05 | 24.198 |
|                                                                 |                       | rs881921    | A             | G            | 0.225         | -0.026       | 0.604       | 0.541      | 0.013      | 5.51E-02     | 0.049       | 3.73E-06      | 492478             | 4.35E-05 | 21.401 |
|                                                                 |                       | rs9539607   | T             | C            | -0.277        | 0.005        | 0.224       | 0.247      | 0.015      | 7.60E-01     | 0.059       | 2.26E-06      | 492478             | 4.54E-05 | 22.363 |
|                                                                 |                       | rs114767765 | T             | C            | 0.427         | 0.018        | 0.022       | 0.019      | 0.046      | 7.01E-01     | 0.093       | 4.64E-06      | 359521             | 5.84E-05 | 20.981 |
| Neuralgia and neuritis, unspecified                             | CCL23                 | rs116769657 | T             | C            | 0.584         | -0.029       | 0.012       | 0.018      | 0.054      | 5.97E-01     | 0.120       | 1.20E-06      | 359521             | 6.56E-05 | 23.585 |
|                                                                 |                       | rs117432663 | A             | G            | 0.217         | -0.011       | 0.121       | 0.071      | 0.023      | 6.32E-01     | 0.046       | 2.61E-06      | 359521             | 6.14E-05 | 22.086 |
|                                                                 |                       | rs1338460   | G             | A            | 0.154         | -0.011       | 0.614       | 0.655      | 0.013      | 3.87E-01     | 0.033       | 3.48E-06      | 359521             | 5.99E-05 | 21.530 |
|                                                                 |                       | rs142461741 | C             | T            | -0.644        | 0.018        | 0.020       | 0.022      | 0.043      | 6.70E-01     | 0.138       | 2.92E-06      | 359521             | 6.08E-05 | 21.870 |
|                                                                 |                       | rs150102867 | G             | A            | 0.506         | 0.073        | 0.018       | 0.014      | 0.063      | 2.49E-01     | 0.106       | 1.64E-06      | 359521             | 6.39E-05 | 22.971 |
|                                                                 |                       | rs1522153   | A             | G            | 0.163         | -0.015       | 0.685       | 0.705      | 0.013      | 2.39E-01     | 0.035       | 3.19E-06      | 359521             | 6.03E-05 | 21.696 |
|                                                                 |                       | rs1854137   | G             | C            | -0.149        | 0.010        | 0.623       | 0.601      | 0.012      | 4.29E-01     | 0.032       | 4.03E-06      | 359521             | 5.91E-05 | 21.251 |
|                                                                 |                       | rs186696265 | T             | C            | 0.539         | 0.006        | 0.016       | 0.018      | 0.050      | 9.00E-01     | 0.107       | 4.35E-07      | 359521             | 7.10E-05 | 25.530 |
|                                                                 |                       | rs1919935   | C             | T            | -0.163        | 0.004        | 0.319       | 0.281      | 0.013      | 7.45E-01     | 0.035       | 3.06E-06      | 359521             | 6.06E-05 | 21.779 |
|                                                                 |                       | rs2811465   | C             | T            | -0.185        | 0.013        | 0.215       | 0.230      | 0.015      | 3.88E-01     | 0.040       | 4.03E-06      | 359521             | 5.91E-05 | 21.250 |
|                                                                 |                       | rs28537856  | G             | C            | 0.721         | -0.026       | 0.007       | 0.016      | 0.070      | 7.12E-01     | 0.155       | 3.51E-06      | 359521             | 5.98E-05 | 21.515 |
|                                                                 |                       | rs62100052  | T             | C            | 0.283         | -0.038       | 0.062       | 0.068      | 0.027      | 1.60E-01     | 0.062       | 4.38E-06      | 359521             | 5.87E-05 | 21.091 |
|                                                                 |                       | rs7310651   | T             | C            | 0.158         | -0.006       | 0.289       | 0.323      | 0.013      | 6.62E-01     | 0.035       | 4.51E-06      | 359521             | 5.85E-05 | 21.036 |
|                                                                 |                       | rs73207239  | C             | A            | -0.285        | 0.003        | 0.082       | 0.071      | 0.023      | 8.99E-01     | 0.062       | 4.89E-06      | 359521             | 5.81E-05 | 20.878 |
|                                                                 |                       | rs75317505  | C             | G            | 0.894         | -0.110       | 0.004       | 0.020      | 0.046      | 1.79E-02     | 0.193       | 3.82E-06      | 359521             | 5.94E-05 | 21.355 |
|                                                                 | CXCL5                 | rs114767765 | T             | C            | 0.427         | 0.011        | 0.022       | 0.019      | 0.046      | 8.15E-01     | 0.093       | 4.64E-06      | 359521             | 5.84E-05 | 20.981 |
|                                                                 |                       | rs116769657 | T             | C            | 0.584         | 0.020        | 0.012       | 0.018      | 0.055      | 7.16E-01     | 0.120       | 1.20E-06      | 359521             | 6.56E-05 | 23.585 |
|                                                                 |                       | rs117432663 | A             | G            | 0.217         | 0.026        | 0.121       | 0.071      | 0.024      | 2.72E-01     | 0.046       | 2.61E-06      | 359521             | 6.14E-05 | 22.086 |
|                                                                 |                       | rs1338460   | G             | A            | 0.154         | 0.006        | 0.614       | 0.655      | 0.013      | 6.17E-01     | 0.033       | 3.48E-06      | 359521             | 5.99E-05 | 21.530 |
|                                                                 |                       | rs142461741 | C             | T            | -0.644        | -0.001       | 0.020       | 0.022      | 0.044      | 9.80E-01     | 0.138       | 2.92E-06      | 359521             | 6.08E-05 | 21.870 |
|                                                                 |                       | rs150102867 | G             | A            | 0.506         | 0.101        | 0.018       | 0.014      | 0.064      | 1.14E-01     | 0.106       | 1.64E-06      | 359521             | 6.39E-05 | 22.971 |
|                                                                 |                       | rs1522153   | A             | G            | 0.163         | 0.004        | 0.685       | 0.705      | 0.013      | 7.41E-01     | 0.035       | 3.19E-06      | 359521             | 6.03E-05 | 21.696 |
|                                                                 |                       | rs1854137   | G             | C            | -0.149        | -0.005       | 0.623       | 0.602      | 0.012      | 7.04E-01     | 0.032       | 4.03E-06      | 359521             | 5.91E-05 | 21.251 |
|                                                                 |                       | rs186696265 | T             | C            | 0.539         | 0.068        | 0.016       | 0.018      | 0.051      | 1.81E-01     | 0.107       | 4.35E-07      | 359521             | 7.10E-05 | 25.530 |
|                                                                 |                       | rs1919935   | C             | T            | -0.163        | -0.009       | 0.319       | 0.281      | 0.013      | 5.12E-01     | 0.035       | 3.06E-06      | 359521             | 6.06E-05 | 21.779 |
|                                                                 |                       | rs2811465   | C             | T            | -0.185        | -0.010       | 0.215       | 0.230      | 0.015      | 5.15E-01     | 0.040       | 4.03E-06      | 359521             | 5.91E-05 | 21.250 |
|                                                                 |                       | rs28537856  | G             | C            | 0.721         | 0.081        | 0.007       | 0.0156     | 0.071      | 2.51E-01     | 0.155       | 3.51E-06      | 359521             | 5.98E-05 | 21.515 |
|                                                                 |                       | rs62100052  | T             | C            | 0.283         | 0.051        | 0.062       | 0.068      | 0.027      | 6.32E-02     | 0.062       | 4.38E-06      | 359521             | 5.87E-05 | 21.091 |
|                                                                 |                       | rs7310651   | T             | C            | 0.158         | 0.006        | 0.289       | 0.323      | 0.013      | 6.59E-01     | 0.035       | 4.51E-06      | 359521             | 5.85E-05 | 21.036 |
|                                                                 |                       | rs73207239  | C             | A            | -0.285        | 1.00E-04     | 0.082       | 0.071      | 0.023      | 9.97E-01     | 0.062       | 4.89E-06      | 359521             | 5.81E-05 | 20.878 |
| rs75317505                                                      | C                     | G           | 0.894         | -0.037       | 0.004         | 0.021        | 0.047       | 4.29E-01   | 0.193      | 3.82E-06     | 359521      | 5.94E-05      | 21.355             |          |        |

Supplementary Table S7: SNPs used as instrumental variables in Mendelian Randomization analysis of neuropathic pain on inflammatory proteins.

STROBE-MR checklist of recommended items to address in reports of Mendelian randomization studies

| Item No. | Section                                             | Checklist item                                                                                                                                                                                                                                                                                                                                                                                                                                                                                                                                                                                                                                                                                                                                                                                                                                                                                                                                                                                             | Page No. | Relevant text from manuscript                                                                                                                                                                                                                                                                                                                                               |
|----------|-----------------------------------------------------|------------------------------------------------------------------------------------------------------------------------------------------------------------------------------------------------------------------------------------------------------------------------------------------------------------------------------------------------------------------------------------------------------------------------------------------------------------------------------------------------------------------------------------------------------------------------------------------------------------------------------------------------------------------------------------------------------------------------------------------------------------------------------------------------------------------------------------------------------------------------------------------------------------------------------------------------------------------------------------------------------------|----------|-----------------------------------------------------------------------------------------------------------------------------------------------------------------------------------------------------------------------------------------------------------------------------------------------------------------------------------------------------------------------------|
| 1        | <b>TITLE and ABSTRACT</b>                           | Indicate Mendelian randomization (MR) as the study's design in the title and/or the abstract if that is a main purpose of the study                                                                                                                                                                                                                                                                                                                                                                                                                                                                                                                                                                                                                                                                                                                                                                                                                                                                        |          | Title: Association of circulating inflammatory proteins with neuropathic pain: A Mendelian randomization                                                                                                                                                                                                                                                                    |
|          | <b>INTRODUCTION</b>                                 |                                                                                                                                                                                                                                                                                                                                                                                                                                                                                                                                                                                                                                                                                                                                                                                                                                                                                                                                                                                                            |          |                                                                                                                                                                                                                                                                                                                                                                             |
| 2        | <b>Background</b>                                   | Explain the scientific background and rationale for the reported study. What is the exposure? Is a potential causal relationship between exposure and outcome plausible? Justify why MR is a helpful method to address the study question                                                                                                                                                                                                                                                                                                                                                                                                                                                                                                                                                                                                                                                                                                                                                                  |          | Exposure involved 91 inflammatory protein GWAS data with an outcome of SP. The use of MR Methods can not only study the causal effects of inflammatory proteins on SP but also show potential in identifying prospective biomarkers associated with SP and assessing risk and protective factors.                                                                           |
| 3        | <b>Objectives</b>                                   | State specific objectives clearly, including pre-specified causal hypotheses (if any). State that MR is a method that, under specific assumptions, intends to estimate causal effects                                                                                                                                                                                                                                                                                                                                                                                                                                                                                                                                                                                                                                                                                                                                                                                                                      |          | MR is a statistical method that utilizes genetic variations as a tool to evaluate causal relationships between inflammatory proteins and SP.                                                                                                                                                                                                                                |
|          | <b>METHODS</b>                                      |                                                                                                                                                                                                                                                                                                                                                                                                                                                                                                                                                                                                                                                                                                                                                                                                                                                                                                                                                                                                            |          |                                                                                                                                                                                                                                                                                                                                                                             |
| 4        | <b>Study design and data sources</b>                | Present key elements of the study design early in the article. Consider including a table listing sources of data for all phases of the study. For each data source contributing to the analysis, describe the following:<br>Setting: Describe the study design and the underlying population, if possible. Describe the setting, locations, and relevant dates, including periods of recruitment, exposure, follow-up, and data collection, when available.<br>Participants: Give the eligibility criteria, and the sources and methods of selection of participants. Report the sample size, and whether any power or sample size calculations were carried out prior to the main analysis.<br>Describe measurement, quality control and selection of genetic variants.<br>For each exposure, outcome, and other relevant variables, describe methods of assessment and diagnostic criteria for diseases.<br>Provide details of ethics committee approval and participant informed consent, if relevant. |          |                                                                                                                                                                                                                                                                                                                                                                             |
|          | a)                                                  | Setting: Describe the study design and the underlying population, if possible. Describe the setting, locations, and relevant dates, including periods of recruitment, exposure, follow-up, and data collection, when available.                                                                                                                                                                                                                                                                                                                                                                                                                                                                                                                                                                                                                                                                                                                                                                            |          | This study describes the study design and underlying population, and specific populations and numbers have been reported.                                                                                                                                                                                                                                                   |
|          | b)                                                  | Participants: Give the eligibility criteria, and the sources and methods of selection of participants. Report the sample size, and whether any power or sample size calculations were carried out prior to the main analysis.                                                                                                                                                                                                                                                                                                                                                                                                                                                                                                                                                                                                                                                                                                                                                                              |          | This paper reports the specific sources of GWAS data, as well as details on sample size and population demographics.                                                                                                                                                                                                                                                        |
|          | c)                                                  | Describe measurement, quality control and selection of genetic variants.                                                                                                                                                                                                                                                                                                                                                                                                                                                                                                                                                                                                                                                                                                                                                                                                                                                                                                                                   |          | This paper describes the sources of instrumental variables and details the selection process and criteria for instrumental variables. Inflammatory proteins as exposed, NP as outcome in Finland in the database are described.                                                                                                                                             |
|          | d)                                                  | For each exposure, outcome, and other relevant variables, describe methods of assessment and diagnostic criteria for diseases.                                                                                                                                                                                                                                                                                                                                                                                                                                                                                                                                                                                                                                                                                                                                                                                                                                                                             |          |                                                                                                                                                                                                                                                                                                                                                                             |
|          | e)                                                  | Provide details of ethics committee approval and participant informed consent, if relevant.                                                                                                                                                                                                                                                                                                                                                                                                                                                                                                                                                                                                                                                                                                                                                                                                                                                                                                                |          | \                                                                                                                                                                                                                                                                                                                                                                           |
| 5        | <b>Assumptions</b>                                  | Explicitly state the three core IV assumptions for the main analysis (relevance, independence and exclusion restriction) as well                                                                                                                                                                                                                                                                                                                                                                                                                                                                                                                                                                                                                                                                                                                                                                                                                                                                           |          | Figure 1 illustrates the three core assumptions.                                                                                                                                                                                                                                                                                                                            |
| 6        | <b>Statistical methods: main analysis</b>           | Describe statistical methods and statistics used                                                                                                                                                                                                                                                                                                                                                                                                                                                                                                                                                                                                                                                                                                                                                                                                                                                                                                                                                           |          |                                                                                                                                                                                                                                                                                                                                                                             |
|          | a)                                                  | Describe how quantitative variables were handled in the analyses (i.e., scale, units, model)                                                                                                                                                                                                                                                                                                                                                                                                                                                                                                                                                                                                                                                                                                                                                                                                                                                                                                               |          | For MR analysis, we use Wald the wire method to analyze only a IV of the protein, fixed effects inverse variance weighting method (IVW) applies to have two or three IVs protein, random effects IVW method suitable for protein with four or more IVs.                                                                                                                     |
|          | b)                                                  | Describe how genetic variants were handled in the analyses and, if applicable, how their weights were selected                                                                                                                                                                                                                                                                                                                                                                                                                                                                                                                                                                                                                                                                                                                                                                                                                                                                                             |          | (1) SNPs associated with exposure at the genome-wide significance level (GWAS, $P \leq 5 \times 10^{-6}$ ), (2) The clustering of LD threshold is set to $r^2 = 0.001$ , clustering the window size is set to 10000KB (3) IVs with F-statistic $< 10$ were considered as weak IVs and excluded from subsequent analysis. The rest of the SNP for subsequent analysis of MR. |
|          | c)                                                  | Describe the MR estimator (e.g. two-stage least squares, Wald ratio) and related statistics. Detail the included covariates and, in case of two-sample MR, whether the same covariate set was used for adjustment in the two samples                                                                                                                                                                                                                                                                                                                                                                                                                                                                                                                                                                                                                                                                                                                                                                       |          | For MR analysis, we use Wald the wire method to analyze only a IV of the protein, fixed effects inverse variance weighting method (IVW) applies to have two or three IVs protein, random effects IVW method suitable for protein with four or more IVs.                                                                                                                     |
|          | d)                                                  | Explain how missing data were addressed                                                                                                                                                                                                                                                                                                                                                                                                                                                                                                                                                                                                                                                                                                                                                                                                                                                                                                                                                                    |          | This paper does not have any missing values.                                                                                                                                                                                                                                                                                                                                |
|          | e)                                                  | If applicable, indicate how multiple testing was addressed                                                                                                                                                                                                                                                                                                                                                                                                                                                                                                                                                                                                                                                                                                                                                                                                                                                                                                                                                 |          | This paper did not employ multivariable MR.                                                                                                                                                                                                                                                                                                                                 |
| 7        | <b>Assessment of assumptions</b>                    | Describe any methods or prior knowledge used to assess the assumptions or justify their validity                                                                                                                                                                                                                                                                                                                                                                                                                                                                                                                                                                                                                                                                                                                                                                                                                                                                                                           |          | This paper reports the use of F-statistics to estimate statistical power.                                                                                                                                                                                                                                                                                                   |
| 8        | <b>Sensitivity analyses and additional analyses</b> | Describe any sensitivity analyses or additional analyses performed (e.g. comparison of effect estimates from different approaches, independent replication, bias analytic techniques, validation of instruments, simulations)                                                                                                                                                                                                                                                                                                                                                                                                                                                                                                                                                                                                                                                                                                                                                                              |          | This paper employs The Cochran's Q to assess the heterogeneity of individual causal effects. MR-Egger's intercept term and MR-PRESSO method are also used to evaluate horizontal pleiotropy. Furthermore, F-statistics are used to assess statistical power.                                                                                                                |
| 9        | <b>Software and pre-registration</b>                |                                                                                                                                                                                                                                                                                                                                                                                                                                                                                                                                                                                                                                                                                                                                                                                                                                                                                                                                                                                                            |          |                                                                                                                                                                                                                                                                                                                                                                             |
|          | a)                                                  | Name statistical software and package(s), including version and settings used                                                                                                                                                                                                                                                                                                                                                                                                                                                                                                                                                                                                                                                                                                                                                                                                                                                                                                                              |          | This paper utilized R software, with R packages including TwoSample MR and MR-PRESSO, all of which are available for free on the official R software website.                                                                                                                                                                                                               |
|          | b)                                                  | State whether the study protocol and details were pre-registered (as well as when and where)                                                                                                                                                                                                                                                                                                                                                                                                                                                                                                                                                                                                                                                                                                                                                                                                                                                                                                               |          | This paper does not provide registration information such as time and address.                                                                                                                                                                                                                                                                                              |
|          | <b>RESULTS</b>                                      |                                                                                                                                                                                                                                                                                                                                                                                                                                                                                                                                                                                                                                                                                                                                                                                                                                                                                                                                                                                                            |          |                                                                                                                                                                                                                                                                                                                                                                             |
| 10       | <b>Descriptive data</b>                             |                                                                                                                                                                                                                                                                                                                                                                                                                                                                                                                                                                                                                                                                                                                                                                                                                                                                                                                                                                                                            |          |                                                                                                                                                                                                                                                                                                                                                                             |
|          | a)                                                  | Report the numbers of individuals at each stage of included studies and reasons for exclusion. Consider use of a flow diagram                                                                                                                                                                                                                                                                                                                                                                                                                                                                                                                                                                                                                                                                                                                                                                                                                                                                              |          | In the methodology section, the paper provides information about the sample population size, while the results section does not include demographic information about the population. Additionally, the paper does not present details about excluded individuals or the reasons for their exclusion.                                                                       |
|          | b)                                                  | Report summary statistics for phenotypic exposure(s), outcome(s), and other relevant variables (e.g. means, SDs, proportions)                                                                                                                                                                                                                                                                                                                                                                                                                                                                                                                                                                                                                                                                                                                                                                                                                                                                              |          | This paper provides a detailed description of the exposure and outcome data.                                                                                                                                                                                                                                                                                                |
|          | c)                                                  | If the data sources include meta-analyses of previous studies, provide the assessments of heterogeneity across these studies                                                                                                                                                                                                                                                                                                                                                                                                                                                                                                                                                                                                                                                                                                                                                                                                                                                                               |          | The original data does not include meta-analysis.                                                                                                                                                                                                                                                                                                                           |
|          | d)                                                  | For two-sample MR:<br>i. Provide justification of the similarity of the genetic variant-exposure associations between the exposure and outcome samples<br>ii. Provide information on the number of individuals who overlap between the exposure and outcome studies                                                                                                                                                                                                                                                                                                                                                                                                                                                                                                                                                                                                                                                                                                                                        |          | This paper falls under the category of two-sample MR with all sample populations originating from Europe, resulting in significant population heterogeneity. There is no information about overlapping populations, and there are no common subjects.                                                                                                                       |
| 11       | <b>Main results</b>                                 |                                                                                                                                                                                                                                                                                                                                                                                                                                                                                                                                                                                                                                                                                                                                                                                                                                                                                                                                                                                                            |          |                                                                                                                                                                                                                                                                                                                                                                             |
|          | a)                                                  | Report the associations between genetic variant and exposure, and between genetic variant and outcome, preferably on an interpretable scale                                                                                                                                                                                                                                                                                                                                                                                                                                                                                                                                                                                                                                                                                                                                                                                                                                                                |          | This paper in the MR results section describes the relationship between instrumental variables and the exposure and outcome.                                                                                                                                                                                                                                                |
|          | b)                                                  | Report MR estimates of the relationship between exposure and outcome, and the measures of uncertainty from the MR analysis, on an interpretable scale, such as odds ratio or relative risk per SD difference                                                                                                                                                                                                                                                                                                                                                                                                                                                                                                                                                                                                                                                                                                                                                                                               |          | This paper reports the odds ratio (OR) and 95% confidence interval (CI) for the association between exposure and outcome in the MR results.                                                                                                                                                                                                                                 |
|          | c)                                                  | If relevant, consider translating estimates of relative risk into absolute risk for a meaningful time period                                                                                                                                                                                                                                                                                                                                                                                                                                                                                                                                                                                                                                                                                                                                                                                                                                                                                               |          | This paper reports which inflammatory proteins are risk for PN in the MR results.                                                                                                                                                                                                                                                                                           |
|          | d)                                                  | Consider plots to visualize results (e.g. forest plot, scatterplot of associations between genetic variants and outcome versus between genetic variants and exposure)                                                                                                                                                                                                                                                                                                                                                                                                                                                                                                                                                                                                                                                                                                                                                                                                                                      |          | Figure 2 and Figure 3.                                                                                                                                                                                                                                                                                                                                                      |
| 12       | <b>Assessment of assumptions</b>                    |                                                                                                                                                                                                                                                                                                                                                                                                                                                                                                                                                                                                                                                                                                                                                                                                                                                                                                                                                                                                            |          |                                                                                                                                                                                                                                                                                                                                                                             |
|          | a)                                                  | Report the assessment of the validity of the assumptions                                                                                                                                                                                                                                                                                                                                                                                                                                                                                                                                                                                                                                                                                                                                                                                                                                                                                                                                                   |          | This paper reports the use of F-statistics to estimate statistical power.                                                                                                                                                                                                                                                                                                   |
|          | b)                                                  | Report any additional statistics (e.g., assessments of heterogeneity across genetic variants, such as $I^2$ , Q statistic or E-value)                                                                                                                                                                                                                                                                                                                                                                                                                                                                                                                                                                                                                                                                                                                                                                                                                                                                      |          | This paper employs The Cochran's Q to assess the heterogeneity of individual causal effects. MR-Egger's intercept term is also used to evaluate horizontal pleiotropy. Furthermore, F-statistics are used to assess statistical power.                                                                                                                                      |
| 13       | <b>Sensitivity analyses and additional analyses</b> |                                                                                                                                                                                                                                                                                                                                                                                                                                                                                                                                                                                                                                                                                                                                                                                                                                                                                                                                                                                                            |          |                                                                                                                                                                                                                                                                                                                                                                             |
|          | a)                                                  | Report any sensitivity analyses to assess the robustness of the main results to violations of the assumptions                                                                                                                                                                                                                                                                                                                                                                                                                                                                                                                                                                                                                                                                                                                                                                                                                                                                                              |          | The Cochran's Q to assess the heterogeneity of individual causal effects. MR-Egger's intercept term is also used to evaluate horizontal pleiotropy.                                                                                                                                                                                                                         |
|          | b)                                                  | Report results from other sensitivity analyses or additional analyses                                                                                                                                                                                                                                                                                                                                                                                                                                                                                                                                                                                                                                                                                                                                                                                                                                                                                                                                      |          | The results of sensitivity analyses are reported.                                                                                                                                                                                                                                                                                                                           |
|          | c)                                                  | Report any assessment of direction of causal relationship (e.g., bidirectional MR)                                                                                                                                                                                                                                                                                                                                                                                                                                                                                                                                                                                                                                                                                                                                                                                                                                                                                                                         |          | Two-way MR Method is adopted in this paper.                                                                                                                                                                                                                                                                                                                                 |
|          | d)                                                  | When relevant, report and compare with estimates from non-MR analyses                                                                                                                                                                                                                                                                                                                                                                                                                                                                                                                                                                                                                                                                                                                                                                                                                                                                                                                                      |          | Results with other non-MR analyses are not reported in this report                                                                                                                                                                                                                                                                                                          |
|          | e)                                                  | Consider additional plots to visualize results (e.g., leave-one-out analyses)                                                                                                                                                                                                                                                                                                                                                                                                                                                                                                                                                                                                                                                                                                                                                                                                                                                                                                                              |          | Supplementary figure                                                                                                                                                                                                                                                                                                                                                        |

| DISCUSSION        |                              |                                                                                                                                                                                                                                                                                                                                                      |                                                                                                                                                                 |
|-------------------|------------------------------|------------------------------------------------------------------------------------------------------------------------------------------------------------------------------------------------------------------------------------------------------------------------------------------------------------------------------------------------------|-----------------------------------------------------------------------------------------------------------------------------------------------------------------|
| 14                | <b>Key results</b>           | Summarize key results with reference to study objectives                                                                                                                                                                                                                                                                                             | This paper summarizes key MR results in Supplementary tables                                                                                                    |
| 15                | <b>Limitations</b>           | Discuss limitations of the study, taking into account the validity of the IV assumptions, other sources of potential bias, and imprecision. Discuss both direction and magnitude of any potential bias and any efforts to address them.                                                                                                              | This paper discusses the limitations of the study, including data sources, the three major assumptions, and the analytical process, providing detailed content. |
| 16                | <b>Interpretation</b>        |                                                                                                                                                                                                                                                                                                                                                      |                                                                                                                                                                 |
|                   | a)                           | Meaning: Give a cautious overall interpretation of results in the context of their limitations and in comparison with other studies                                                                                                                                                                                                                  | This paper dedicates a substantial portion to discussing                                                                                                        |
|                   | b)                           | Mechanism: Discuss underlying biological mechanisms that could drive a potential causal relationship between the investigated exposure and the outcome, and whether the gene-environment equivalence assumption is reasonable. Use causal language carefully, clarifying that IV estimates may provide causal effects only under certain assumptions | Various positive proteins provide a reasonable interpretation of MR results by comparing them with multiple previously published studies.                       |
|                   | c)                           | Clinical relevance: Discuss whether the results have clinical or public policy relevance, and to what extent they inform effect sizes of possible interventions                                                                                                                                                                                      | The various biological mechanisms by which inflammatory proteins are involved in neuropathic pain are discussed.                                                |
| 17                | <b>Generalizability</b>      | Discuss the generalizability of the study results (a) to other populations, (b) across other exposure periods/timings, and (c) across other levels of exposure                                                                                                                                                                                       | Limitations of the study and the population used are reported.                                                                                                  |
| OTHER INFORMATION |                              |                                                                                                                                                                                                                                                                                                                                                      |                                                                                                                                                                 |
| 18                | <b>Funding</b>               | Describe sources of funding and the role of funders in the present study and, if applicable, sources of funding for the databases and original study or studies on which the present study is based                                                                                                                                                  | No funding was received for the current study.                                                                                                                  |
| 19                | <b>Data and data sharing</b> | Provide the data used to perform all analyses or report where and how the data can be accessed, and reference these sources in the article. Provide the statistical code needed to reproduce the results in the article, or report whether the code is publicly accessible and if so, where                                                          | The data in this manuscript are all available in publicly available databases and are referenced by link in the article.                                        |
| 20                | <b>Conflicts of Interest</b> | All authors should declare all potential conflicts of interest                                                                                                                                                                                                                                                                                       | The authors have no relevant financial or non-financial interests to disclose.                                                                                  |

Supplementary Table S8: STROBE-MR checklist of recommended items to address in reports of Mendelian randomization studies
